# Supplementary material
Source: PubMed Central journal article supplement (PMC8364835)
Supplement: 11101_2021_9773_MOESM1_ESM.pdf [file 11101_2021_9773_MOESM1_ESM.pdf]

A review of alpha-glucosidase inhibitors from plants as potential candidates for the treatment of type-2 diabetes (submission to *Phytochemistry Reviews*)

Amina M. Dirir <sup>1</sup>, Marianne Daou <sup>1</sup>, Ahmed F. Yousef <sup>1</sup>, Lina F. Yousef <sup>1\*</sup>

<sup>1</sup>Department of Chemistry, Khalifa University, SAN Campus, Abu Dhabi, UAE

\*Corresponding author email: [lina.yousef@ku.ac.ae](mailto:lina.yousef@ku.ac.ae)

## Online resource 1: List of plant-derived alpha-glucosidase inhibiting molecules organized according to their chemical classification

| No. | Classes               | Compound name                                                                                     | Plant source          | IC50 (µM) | Mode of inhibition | IC50 of the positive control (µM) | References              |
|-----|-----------------------|---------------------------------------------------------------------------------------------------|-----------------------|-----------|--------------------|-----------------------------------|-------------------------|
| 1   | Sesquiterpenoids      | 1S,4S,5S,6R,7R,9S,10S)-1,9-dibenzoyloxy-6-cinnamoyloxy-4-hydroxydihydro-β-agarofuran              | Celastrus paniculatus | 39.56     | ND                 | Acarbose (52.87)                  | (Sasikumar et al. 2018) |
| 2   |                       | 1S,4S,5R,7S,8S,9S,10S)-1,8,15-triacetoxy-9-bezoyloxy-4-hydroxydihydro-β-agarofuran                | Celastrus paniculatus | 51.23     | ND                 | Acarbose (52.87)                  | (Sasikumar et al. 2018) |
| 3   |                       | 1R,2R,4S,5S,6R,7R,9S,10R)-1,9-dibenzoyloxy-2-acetoxy-6-cinnamoyloxy-4-hydroxydihydro-β-agarofuran | Celastrus paniculatus | 35.6      | ND                 | Acarbose (52.87)                  | (Sasikumar et al. 2018) |
| 4   |                       | 1α-acetoxy-6β,9α-dibenzoyloxy-8α-cinnamoyloxy-4β-hydroxydihydro-β-agarofuran                      | Celastrus paniculatus | 36.54     | ND                 | Acarbose (52.87)                  | (Sasikumar et al. 2018) |
| 5   |                       | 1α,6β,9β-tribenzoyloxy-4β-hydroxydihydro-β-agarofuran                                             | Celastrus paniculatus | 44.83     | ND                 | Acarbose (52.87)                  | (Sasikumar et al. 2018) |
| 6   |                       | 1α,2α,6β,15-tetraacetoxy-9α-benzoyloxy-4β,8β-dihydroxydihydro-β-agarofuran                        | Celastrus paniculatus | 51.6      | ND                 | Acarbose (52.87)                  | (Sasikumar et al. 2018) |
| 7   |                       | 1α,6β,8β,15-tetraacetoxy-9α-benzoyloxy-4β-hydroxydihydro-β-agarofuran                             | Celastrus paniculatus | 42.58     | ND                 | Acarbose (52.87)                  | (Sasikumar et al. 2018) |
| 8   |                       | 1α,8β-diacetoxy-6β,9β-dibenzoyloxy-4β-hydroxydihydro-β-agarofuran                                 | Celastrus paniculatus | 53.67     | ND                 | Acarbose (52.87)                  | (Sasikumar et al. 2018) |
| 9   |                       | 1α-acetoxy-6β,9β-dibenzoyloxy-8α,4β-dihydroxydihydro-β-agarofuran                                 | Celastrus paniculatus | 50.6      | ND                 | Acarbose (52.87)                  | (Sasikumar et al. 2018) |
| 10  |                       | 1α,9β-dibenzoyloxy-6β-acetoxy-8α,4β-dihydroxydihydro-β-agarofuran                                 | Celastrus paniculatus | 51.7      | ND                 | Acarbose (52.87)                  | (Sasikumar et al. 2018) |
| 11  |                       | 1α,9β-dibenzoyloxy-4β-hydroxydihydro-β-agarofuran                                                 | Celastrus paniculatus | 45.84     | ND                 | Acarbose (52.87)                  | (Sasikumar et al. 2018) |
| 12  |                       | 6-isopropyl-4,10-dimethyldecahydro-2,3,4-naphthalenetriol                                         | Teucrium Mascatense   | 121.2     | ND                 | Acarbose (942.0)                  | (Rizvi et al. 2019)     |
| 13  |                       | α-humulene                                                                                        | Zingiber zerumbet     | 197.2     | ND                 | Acarbose (47.2)                   | (Ajish et al. 2015)     |
| 14  |                       | Zerumbone                                                                                         | Zingiber zerumbet     | 95.7      | ND                 | Acarbose (47.2)                   | (Ajish et al. 2015)     |
| 15  |                       | Zerumbol                                                                                          | Zingiber zerumbet     | 116.1     | ND                 | Acarbose (47.2)                   | (Ajish et al. 2015)     |
| 16  | Zerumbone 2,3-epoxide | Zingiber zerumbet                                                                                 | 170.25                | ND        | Acarbose (47.2)    | (Ajish et al. 2015)               |                         |

| No. | Classes                                                                            | Compound name                                                                                 | Plant source           | IC50 (µM)                  | Mode of inhibition         | IC50 of the positive control (µM) | References            |
|-----|------------------------------------------------------------------------------------|-----------------------------------------------------------------------------------------------|------------------------|----------------------------|----------------------------|-----------------------------------|-----------------------|
| 17  | Diterpenoids                                                                       | (5S,9S,10S,12E)-labda-8(17),12-diene-15,16-dioic anhydride                                    | Amomum villosum        | 21.1                       | ND                         | Genistein (17.6)                  | (Yin et al. 2019)     |
| 18  |                                                                                    | (5S,9S,10S,16R,11E)-16-hydroxylabda-8(17),11,13-trien-15,16-olide                             | Amomum villosum        | 10                         | Mixed-type inhibition      | Genistein (17.6)                  | (Yin et al. 2019)     |
| 19  |                                                                                    | labda-8(17),13(14)-dien-15,16-olide                                                           | Amomum villosum        | 14.8                       | ND                         | Genistein (17.6)                  | (Yin et al. 2019)     |
| 20  |                                                                                    | (E)-labda-8(17),12-dien-16,15-olide                                                           | Amomum villosum        | 17.1                       | ND                         | Genistein (17.6)                  | (Yin et al. 2019)     |
| 21  |                                                                                    | Coronar-D methyl ether                                                                        | Amomum villosum        | 15.8                       | ND                         | Genistein (17.6)                  | (Yin et al. 2019)     |
| 22  |                                                                                    | Coronar-D ethyl ether                                                                         | Amomum villosum        | 13.8                       | ND                         | Genistein (17.6)                  | (Yin et al. 2019)     |
| 23  |                                                                                    | 15-hydroxylabda-8(17),13-dien-16,15-olide                                                     | Amomum villosum        | 17.5                       | ND                         | Genistein (17.6)                  | (Yin et al. 2019)     |
| 24  |                                                                                    | Methyl 15,16-dinor-7-oxolabda-8-ene-14-oate                                                   | Leonurus japonicus     | 220.2                      | ND                         | Acarbose (214.5)                  | (Nguyen et al. 2017a) |
| 25  |                                                                                    | Hispanone                                                                                     | Leonurus japonicus     | 235.2                      | ND                         | Acarbose (214.5)                  | (Nguyen et al. 2017a) |
| 26  |                                                                                    | Leoheteronins A                                                                               | Leonurus japonicus     | 234.9                      | ND                         | Acarbose (214.5)                  | (Nguyen et al. 2017a) |
| 27  |                                                                                    | 15-methoxyleoheteronin B                                                                      | Leonurus japonicus     | 26.7                       | ND                         | Acarbose (214.5)                  | (Nguyen et al. 2017a) |
| 28  |                                                                                    | Taxumariene A                                                                                 | Taxus mairei           | 5.97                       | ND                         | Acarbose (155.86)                 | (Chen et al. 2020)    |
| 29  |                                                                                    | Taxumariene B                                                                                 | Taxus mairei           | 108.42                     | ND                         | Acarbose (155.86)                 | (Chen et al. 2020)    |
| 30  |                                                                                    | Taxumariene C                                                                                 | Taxus mairei           | 16.54                      | ND                         | Acarbose (155.86)                 | (Chen et al. 2020)    |
| 31  |                                                                                    | Taxumariene D                                                                                 | Taxus mairei           | 13.52                      | ND                         | Acarbose (155.86)                 | (Chen et al. 2020)    |
| 32  |                                                                                    | Taxumariene E                                                                                 | Taxus mairei           | 38.53                      | ND                         | Acarbose (155.86)                 | (Chen et al. 2020)    |
| 33  |                                                                                    | Taxumariene G                                                                                 | Taxus mairei           | 30.71                      | ND                         | Acarbose (155.86)                 | (Chen et al. 2020)    |
| 34  |                                                                                    | Chepraecoxin A                                                                                | Chelonopsis praecox    | 305                        | Non-competitive inhibition | Acarbose (172.3)                  | (Deng et al. 2019)    |
| 35  |                                                                                    | Chepraecoxin B                                                                                | Chelonopsis praecox    | 532.5                      | ND                         | Acarbose (172.3)                  | (Deng et al. 2019)    |
| 36  |                                                                                    | Chepraecoxin C                                                                                | Chelonopsis praecox    | 675.6                      | ND                         | Acarbose (172.3)                  | (Deng et al. 2019)    |
| 37  |                                                                                    | Chepraecoxin D                                                                                | Chelonopsis praecox    | 884.4                      | ND                         | Acarbose (172.3)                  | (Deng et al. 2019)    |
| 38  |                                                                                    | Chepraecoxin F                                                                                | Chelonopsis praecox    | 361                        | ND                         | Acarbose (172.3)                  | (Deng et al. 2019)    |
| 39  |                                                                                    | Eupractenoid A                                                                                | Euphorbia ebracteolata | 7.94                       | Non-competitive inhibition | Acarbose (578.75)                 | (Wei et al. 2017b)    |
| 40  |                                                                                    | Eupractenoid B                                                                                | Euphorbia ebracteolata | 50.36                      | ND                         | Acarbose (578.75)                 | (Wei et al. 2017b)    |
| 41  |                                                                                    | 4β,9α,20-trihydroxy-13,15-secotiglia-1,6-diene-3,13-dione 20-O-β-D-[6-galloyl]glucopyranoside | Euphorbia fischeriana  | 23.6                       | ND                         | Acarbose (560.2)                  | (Wei et al. 2017c)    |
| 42  | 4β,9α,20-trihydroxy-13,15-secotiglia-1,6-diene-3,13-dione-20-O-β-D-glucopyranoside | Euphorbia fischeriana                                                                         | 30.3                   | ND                         | Acarbose (560.2)           | (Wei et al. 2017c)                |                       |
| 43  | Ent-8(14)-pimarene-12β,15S,16-triol                                                | Euphorbia fischeriana                                                                         | 128.5                  | ND                         | Acarbose (560.2)           | (Wei et al. 2017c)                |                       |
| 44  | Sapinsigin D                                                                       | Sapium insigne                                                                                | 340                    | Non-competitive inhibition | Acarbose (148.5)           | (Yan et al. 2018)                 |                       |
| 45  | Sapinsigin F                                                                       | Sapium insigne                                                                                | 587.3                  | ND                         | Acarbose (148.5)           | (Yan et al. 2018)                 |                       |

| No. | Classes       | Compound name                                                                                                                                                   | Plant source          | IC50 (µM) | Mode of inhibition | IC50 of the positive control (µM) | References              |
|-----|---------------|-----------------------------------------------------------------------------------------------------------------------------------------------------------------|-----------------------|-----------|--------------------|-----------------------------------|-------------------------|
| 46  | Triterpenoids | Charantoside IX                                                                                                                                                 | Momordica charantia   | 57.13     | ND                 | Acarbose (5.48)                   | (Yue et al. 2017)       |
| 47  |               | Charantoside VI                                                                                                                                                 | Momordica charantia   | 45.1      | ND                 | Acarbose (5.48)                   | (Yue et al. 2017)       |
| 48  |               | 5b,19-epoxy-23(S)-methoxycucurbita-6,24-dien-3b-ol                                                                                                              | Momordica charantia   | 27.7      | ND                 | Acarbose (5.48)                   | (Yue et al. 2017)       |
| 49  |               | 25-O-methylkaraviagein D                                                                                                                                        | Momordica charantia   | 10.19     | ND                 | Acarbose (5.48)                   | (Yue et al. 2017)       |
| 50  |               | Charantoside C                                                                                                                                                  | Momordica charantia   | 51.21     | ND                 | Acarbose (5.48)                   | (Yue et al. 2017)       |
| 51  |               | Karaviloside I                                                                                                                                                  | Momordica charantia   | 35.31     | ND                 | Acarbose (5.48)                   | (Yue et al. 2017)       |
| 52  |               | Karaviloside II                                                                                                                                                 | Momordica charantia   | 28.55     | ND                 | Acarbose (5.48)                   | (Yue et al. 2017)       |
| 53  |               | (19R,23E)-5b,19-epoxy-19,25-dimethoxycucurbita-6,23-dien-3b-ol                                                                                                  | Momordica charantia   | 20.2      | ND                 | Acarbose (5.48)                   | (Yue et al. 2017)       |
| 54  |               | Goyaglycoside d                                                                                                                                                 | Momordica charantia   | 108.43    | ND                 | Acarbose (5.48)                   | (Yue et al. 2017)       |
| 55  |               | (19R,23E)-5b,19-epoxy-19-methoxycucurbita-6,23-dien-3b,25-diol                                                                                                  | Momordica charantia   | 76.91     | ND                 | Acarbose (5.48)                   | (Yue et al. 2017)       |
| 56  |               | Goyaglycoside b                                                                                                                                                 | Momordica charantia   | 30.96     | ND                 | Acarbose (5.48)                   | (Yue et al. 2017)       |
| 57  |               | Charantoside I                                                                                                                                                  | Momordica charantia   | 32.52     | ND                 | Acarbose (5.48)                   | (Yue et al. 2017)       |
| 58  |               | 3α,21β,22α-trihydroxy-21,22-bis(2-methyl-1-oxobutoxy)-olean-15-en-23-methyl carboxylate-3yl-3-O-β-D-glucopyranosyl(1→3)-O-β-D-glucuronopyranoside               | Gymnema sylvestre     | 79        | ND                 | Acarbose (147.15)                 | (Alkefaia et al. 2019)  |
| 59  |               | 3α,7β,21β,22α-tetrahydroxy-21,22-bis(2-methyl-1-oxobutoxy)-olean-15-en-3yl-3-O-β-D-glucopyranosyl(1→3)-O-β-D-glucuronopyranoside                                | Gymnema sylvestre     | 122       | ND                 | Acarbose (147.15)                 | (Alkefaia et al. 2019)  |
| 60  |               | 3α,7β,21β,22α-tetrahydroxy-21-(2-methyl-1-oxobutoxy)-22-[(2-methyl-1-oxobutenyl)oxy]olean-15-en-3yl-3-O-β-D-glucopyranosyl(1→3)-O-β-D-glucuronopyranoside       | Gymnema sylvestre     | 63.4      | ND                 | Acarbose (147.15)                 | (Alkefaia et al. 2019)  |
| 61  |               | 3α,7β,21β,22α-tetrahydroxyolean-15-en-23,29-dioic acid-3-yl-3-O-β-D-glucopyranosyl(1→3)-O-β-D-glucuronopyranoside                                               | Gymnema sylvestre     | 65.33     | ND                 | Acarbose (147.15)                 | (Alkefaia et al. 2019)  |
| 62  |               | 3β,7β,21β,22α,23,28-hexahydroxy-21-(2-methyl-1-oxobutoxy)-22-[(2-methyl-1-oxobutenyl)oxy]olean-15-en-3-yl-3-O-β-D-glucopyranosyl(1→3)-O-β-D-glucuronopyranoside | Gymnema sylvestre     | 126.73    | ND                 | Acarbose (147.15)                 | (Alkefaia et al. 2019)  |
| 63  |               | 3-oxolupenal                                                                                                                                                    | Nuxia oppositifolia   | 142.01    | ND                 | Acarbose (59.01)                  | (Alqahtani et al. 2020) |
| 64  |               | Katononic acid                                                                                                                                                  | Nuxia oppositifolia   | 194.85    | ND                 | Acarbose (59.01)                  | (Alqahtani et al. 2020) |
| 65  |               | Oleanolic acid                                                                                                                                                  | Salvia africana-lutea | 50.1      | ND                 | Acarbose (945.5)                  | (Etsassala et al. 2019) |

| No. | Classes       | Compound name                                                    | Plant source          | IC50 (µM) | Mode of inhibition | IC50 of the positive control (µM) | References              |
|-----|---------------|------------------------------------------------------------------|-----------------------|-----------|--------------------|-----------------------------------|-------------------------|
| 66  | Triterpenoids | Ursolic acid                                                     | Salvia africana-lutea | 24.7      | ND                 | Acarbose (945.5)                  | (Etsassala et al. 2019) |
| 67  |               | β-amyrin                                                         | Salvia africana-lutea | 40.1      | ND                 | Acarbose (945.5)                  | (Etsassala et al. 2019) |
| 68  |               | 11,12-dehydroursolic acid lactone                                | Salvia africana-lutea | 188.7     | ND                 | Acarbose (945.5)                  | (Etsassala et al. 2019) |
| 69  |               | Leucriterpencoside                                               | Leucas zeylanica      | 0.85      | ND                 | Acarbose (2.35)                   | (Chen et al. 2019)      |
| 70  |               | 3β-hydroxy-30-hydroperoxy-20-taraxastene                         | Cirsium setosum       | 18.34     | ND                 | Acarbose (42.52)                  | (Li et al. 2019a)       |
| 71  |               | 3β-hydroxy-22α-methoxy-20-taraxastene                            | Cirsium setosum       | 26.98     | ND                 | Acarbose (42.52)                  | (Li et al. 2019a)       |
| 72  |               | 30-nor-3β,22α-dihydroxy-20-taraxastene                           | Cirsium setosum       | 44.62     | ND                 | Acarbose (42.52)                  | (Li et al. 2019a)       |
| 73  |               | 3β,22α-dihydroxy-20-taraxastene                                  | Cirsium setosum       | 17.49     | ND                 | Acarbose (42.52)                  | (Li et al. 2019a)       |
| 74  |               | 20-taraxastene-3,22-dione                                        | Cirsium setosum       | 68.9      | ND                 | Acarbose (42.52)                  | (Li et al. 2019a)       |
| 75  |               | 3β-acetoxy-20-taraxastene-22-one                                 | Cirsium setosum       | 54.16     | ND                 | Acarbose (42.52)                  | (Li et al. 2019a)       |
| 76  |               | 3β-hydroxy-20-taraxastene-22-one                                 | Cirsium setosum       | 22.67     | ND                 | Acarbose (42.52)                  | (Li et al. 2019a)       |
| 77  |               | 30-nor-3β-hydroxy-20-taraxastene                                 | Cirsium setosum       | 80.07     | ND                 | Acarbose (42.52)                  | (Li et al. 2019a)       |
| 78  |               | 3b-acetoxy-20-oxo-21-nordammaran-23-carboxylic acid methyl ester | Artemisia argyi       | 101.04    | ND                 | Acarbose (333.53)                 | (Zhang et al. 2020)     |
| 79  |               | 3b-acetoxy-17b-dammaranic acid                                   | Artemisia argyi       | 105.54    | ND                 | Acarbose (333.53)                 | (Zhang et al. 2020)     |
| 80  |               | 2a,3b,23-trihydroxymultiflor-7-en-28-oic acid                    | Akebia trifoliata     | 109       | ND                 | Acarbose (409)                    | (Ouyang et al. 2018)    |
| 81  |               | Akebiaoside C                                                    | Akebia trifoliata     | 15        | ND                 | Acarbose (409)                    | (Ouyang et al. 2018)    |
| 82  |               | 2a,3bdihydroxyolean-13(18)-en-28-oic acid                        | Akebia trifoliata     | 21        | ND                 | Acarbose (409)                    | (Ouyang et al. 2018)    |
| 83  |               | 2a,3b,29-trihydroxyolean-12-en-28-oic acid                       | Akebia trifoliata     | 503       | ND                 | Acarbose (409)                    | (Ouyang et al. 2018)    |
| 84  |               | Stachlic acid A                                                  | Akebia trifoliata     | 592       | ND                 | Acarbose (409)                    | (Ouyang et al. 2018)    |
| 85  |               | Mesembryanthemoidigenic acid                                     | Akebia trifoliata     | 42        | ND                 | Acarbose (409)                    | (Ouyang et al. 2018)    |
| 86  |               | 2a,3b,20a-trihydroxy-29-norolean-12-en-28-oic acid               | Akebia trifoliata     | 367       | ND                 | Acarbose (409)                    | (Ouyang et al. 2018)    |
| 87  |               | Gypsogenic acid                                                  | Akebia trifoliata     | 9         | ND                 | Acarbose (409)                    | (Ouyang et al. 2018)    |
| 88  |               | Serratagenic acid                                                | Akebia trifoliata     | 60        | ND                 | Acarbose (409)                    | (Ouyang et al. 2018)    |
| 89  |               | Lupeol                                                           | Pueraria lobata       | 176.35    | ND                 | Acarbose (144.26)                 | (Seong et al. 2016)     |
| 90  |               | Lupenone                                                         | Pueraria lobata       | 112.36    | ND                 | Acarbose (144.26)                 | (Seong et al. 2016)     |
| 91  |               | Betulinic acid                                                   | Euonymus alatus       | 83.6      | ND                 | Acarbose (310.2)                  | (Choi et al. 2015)      |
| 92  |               | Hederagenin                                                      | Euonymus alatus       | 85.3      | ND                 | Acarbose (310.2)                  | (Choi et al. 2015)      |
| 93  |               | Rhodotomoside A                                                  | Rhodomyrtus tomentosa | 426       | ND                 | Acarbose (26.33)                  | (Mo et al. 2019)        |

| No. | Classes                                                                             | Compound name                     | Plant source           | IC50 (µM)             | Mode of inhibition         | IC50 of the positive control (µM) | References               |                   |
|-----|-------------------------------------------------------------------------------------|-----------------------------------|------------------------|-----------------------|----------------------------|-----------------------------------|--------------------------|-------------------|
| 94  | Isoflavonoids                                                                       | Prunetin 5-O-β-glucopyranoside    | Potentilla astracanica | 120.95                | Un-competitive inhibition  | Acarbose (49.44)                  | (Şöhretoğlu et al. 2017) |                   |
| 95  |                                                                                     | Genistein 5-O-β-glucopyranoside   | Potentilla astracanica | 96.21                 | Competitive inhibition     | Acarbose (49.44)                  | (Şöhretoğlu et al. 2017) |                   |
| 96  |                                                                                     | Prunetin                          | Potentilla astracanica | 112.11                | Non-competitive inhibition | Acarbose (49.44)                  | (Şöhretoğlu et al. 2017) |                   |
| 97  |                                                                                     | Genistein                         | Potentilla astracanica | 5.43                  | Un-competitive inhibition  | Acarbose (49.44)                  | (Şöhretoğlu et al. 2017) |                   |
| 98  |                                                                                     | 3S,4R-tuberosin                   | Pueraria lobata        | 378.89                | ND                         | Acarbose (1998.79)                | (Wang et al. 2017b)      |                   |
| 99  |                                                                                     | Daidzein                          | Pueraria lobata        | 23.01                 | Non-competitive inhibition | Acarbose (1998.79)                | (Wang et al. 2017b)      |                   |
| 100 |                                                                                     | Puerarin                          | Pueraria lobata        | 524.08                | ND                         | Acarbose (1998.79)                | (Wang et al. 2017b)      |                   |
| 101 |                                                                                     | Daidzin                           | Pueraria lobata        | 253.78                | ND                         | Acarbose (1998.79)                | (Wang et al. 2017b)      |                   |
| 102 |                                                                                     | Ononin                            | Pueraria lobata        | 422.89                | ND                         | Acarbose (1998.79)                | (Wang et al. 2017b)      |                   |
| 103 |                                                                                     | Calycosin                         | Pueraria lobata        | 6.84                  | Non-competitive inhibition | Acarbose (144.26)                 | (Seong et al. 2016)      |                   |
| 104 |                                                                                     | Coumestrol                        | Pueraria lobata        | 495.03                | ND                         | Acarbose (93.1)                   | (Seong et al. 2016)      |                   |
| 105 |                                                                                     | Puerarol                          | Pueraria lobata        | 50.7                  | ND                         | Acarbose (93.1)                   | (Seong et al. 2016)      |                   |
| 106 |                                                                                     | Flavanones                        | Farrerol               | Matteuccia intermedia | 44.1                       | ND                                | Acarbose (172.3)         | (Li et al. 2019b) |
| 107 |                                                                                     |                                   | Matteucin              | Matteuccia intermedia | 37.6                       | ND                                | Acarbose (172.3)         | (Li et al. 2019b) |
| 108 | Matteucinol                                                                         |                                   | Matteuccia intermedia  | 28                    | ND                         | Acarbose (172.3)                  | (Li et al. 2019b)        |                   |
| 109 | Methoxymatteucin                                                                    |                                   | Matteuccia intermedia  | 69.7                  | ND                         | Acarbose (172.3)                  | (Li et al. 2019b)        |                   |
| 110 | 3'-hydroxy-matteucinol                                                              |                                   | Matteuccia intermedia  | 43.6                  | ND                         | Acarbose (172.3)                  | (Li et al. 2019b)        |                   |
| 111 | Cyrtometin                                                                          |                                   | Matteuccia intermedia  | 12.4                  | ND                         | Acarbose (172.3)                  | (Li et al. 2019b)        |                   |
| 112 | (2S)-7,4'-hydroxyl-6-(2",3"-epoxy-3"-methylbutyl) flavanone                         |                                   | Psoralea corylifolia   | 29.2                  | ND                         | Acarbose (214.1)                  | (Liu et al. 2018)        |                   |
| 113 | Brosimacutin E                                                                      |                                   | Psoralea corylifolia   | 99.5                  | ND                         | Acarbose (214.1)                  | (Liu et al. 2018)        |                   |
| 114 | (2S)-7-methoxy-6-(2-hydroxy-3-methylbut-3-en-1-yl)-2-(4-hydroxyphenyl)chroman-4-One |                                   | Psoralea corylifolia   | 41.2                  | ND                         | Acarbose (214.8)                  | (Zhu et al. 2019)        |                   |
| 115 | (2S)-4'-hydroxyl-7-hydroxymethylene-6-(2",3"-epoxy-3"-methylbutyl)flavanone         |                                   | Psoralea corylifolia   | 32.7                  | ND                         | Acarbose (214.8)                  | (Zhu et al. 2019)        |                   |
| 116 | Bavachinone B                                                                       |                                   | Psoralea corylifolia   | 28                    | ND                         | Acarbose (214.8)                  | (Zhu et al. 2019)        |                   |
| 117 | Flavanols                                                                           | (-)-epicatechin-3-O-(E)-coumarate | Camellia sinensis      | 62.1                  | ND                         | Acarbose (0.97)                   | (Wang et al. 2017a)      |                   |
| 118 |                                                                                     | (-)-epicatechin-3-O-(E)-caffeate  | Camellia sinensis      | 107.1                 | ND                         | Acarbose (0.97)                   | (Wang et al. 2017a)      |                   |
| 119 |                                                                                     | Ampelopsin                        | Camellia sinensis      | 104.6                 | ND                         | Acarbose (0.97)                   | (Wang et al. 2017a)      |                   |
| 120 |                                                                                     | (-)-epicatechin-3-O-gallate       | Camellia sinensis      | 84.2                  | ND                         | Acarbose (0.97)                   | (Wang et al. 2017a)      |                   |
| 121 |                                                                                     | (-)-epiafzelechin-3-O-gallate     | Camellia sinensis      | 71.3                  | ND                         | Acarbose (0.97)                   | (Wang et al. 2017a)      |                   |
| 122 |                                                                                     | (+)-catechin-3-O-gallate          | Camellia sinensis      | 32.5                  | ND                         | Acarbose (0.97)                   | (Wang et al. 2017a)      |                   |
| 123 |                                                                                     | (+)-epiafzelechin-3-O-gallate     | Camellia sinensis      | 74.6                  | ND                         | Acarbose (0.97)                   | (Wang et al. 2017a)      |                   |
| 124 |                                                                                     | (-)-epigallo-catechin             | Camellia sinensis      | 89.7                  | ND                         | Acarbose (0.97)                   | (Wang et al. 2017a)      |                   |
| 125 |                                                                                     | (+)-gallocatechin                 | Camellia sinensis      | 91.8                  | ND                         | Acarbose (0.97)                   | (Wang et al. 2017a)      |                   |
| 126 |                                                                                     | (-)-epigallo-catechin-3-O-gallate | Camellia sinensis      | 78.1                  | ND                         | Acarbose (0.97)                   | (Wang et al. 2017a)      |                   |
| 127 | (+)-gallocatechin-3-O-gallate                                                       | Camellia sinensis                 | 78.7                   | ND                    | Acarbose (0.97)            | (Wang et al. 2017a)               |                          |                   |

| No. | Classes                                                  | Compound name                                                                | Plant source         | IC50 (µM)              | Mode of inhibition         | IC50 of the positive control (µM) | References               |
|-----|----------------------------------------------------------|------------------------------------------------------------------------------|----------------------|------------------------|----------------------------|-----------------------------------|--------------------------|
| 128 | Flavonols                                                | Rutin                                                                        | Potentilla inclinata | 43.09                  | ND                         | Acarbose (49.44)                  | (Şöhretoğlu et al. 2018) |
| 129 |                                                          | Kaempferol-3-O- $\alpha$ -rhamnopyranosyl-(1→6)- $\beta$ -glucopyranoside    | Potentilla inclinata | 231.92                 | Un-competitive inhibition  | Acarbose (49.44)                  | (Şöhretoğlu et al. 2018) |
| 130 |                                                          | Quercetin-3-O- $\beta$ -glucopyranoside                                      | Potentilla inclinata | 245.5                  | Non-competitive inhibition | Acarbose (49.44)                  | (Şöhretoğlu et al. 2018) |
| 131 |                                                          | Sexangu-laretin 3-O- $\beta$ -glucopyranosyl-(1→2)- $\beta$ -glucopyranoside | Potentilla inclinata | 144.96                 | Non-competitive inhibition | Acarbose (49.44)                  | (Şöhretoğlu et al. 2018) |
| 132 |                                                          | Quercetin                                                                    | Lumnitzera littorea  | 11.24                  | ND                         | Acarbose (214.06)                 | (Thuy et al. 2019)       |
| 133 |                                                          | Quercitrin                                                                   | Lumnitzera littorea  | 17.17                  | ND                         | Acarbose (214.06)                 | (Thuy et al. 2019)       |
| 134 |                                                          | Myricetin                                                                    | Lumnitzera littorea  | 307.31                 | ND                         | Acarbose (214.06)                 | (Thuy et al. 2019)       |
| 135 |                                                          | Myricitrin                                                                   | Lumnitzera littorea  | 330.55                 | ND                         | Acarbose (214.06)                 | (Thuy et al. 2019)       |
| 136 |                                                          | Afzelin                                                                      | Lumnitzera littorea  | 14.57                  | ND                         | Acarbose (214.06)                 | (Thuy et al. 2019)       |
| 137 |                                                          | Myricetin 3-O-(4''-O-galloyl)- $\alpha$ -L-rhamnopyranoside                  | Lumnitzera littorea  | 67.4                   | ND                         | Acarbose (214.06)                 | (Thuy et al. 2019)       |
| 138 |                                                          | Isovitexin                                                                   | Tinospora crispa     | 61.2                   | ND                         | Acarbose (0.033)                  | (Chang et al. 2015)      |
| 139 |                                                          | Isoorientin 2''-(E)-p-coumarate                                              | Tinospora crispa     | 35.7                   | ND                         | Acarbose (0.033)                  | (Chang et al. 2015)      |
| 140 |                                                          | Isovitexin 2''-(E)-p-coumarate                                               | Tinospora crispa     | 4.3                    | ND                         | Acarbose (0.033)                  | (Chang et al. 2015)      |
| 141 | Cosmosiin 6''-(E)-ferulate                               | Tinospora crispa                                                             | 8.8                  | ND                     | Acarbose (0.033)           | (Chang et al. 2015)               |                          |
| 142 | Cosmosiin 6''-(E)-p-coumarate                            | Tinospora crispa                                                             | 14.6                 | ND                     | Acarbose (0.033)           | (Chang et al. 2015)               |                          |
| 143 | Cosmosiin 6''-(E)-cinnamate                              | Tinospora crispa                                                             | 11.3                 | ND                     | Acarbose (0.033)           | (Chang et al. 2015)               |                          |
| 144 | Leontopodioside A                                        | Leontopodium leontopodioides                                                 | 55.6                 | ND                     | Acarbose (626.3)           | (Xiao et al. 2016)                |                          |
| 145 | Leontopodioside B                                        | Leontopodium leontopodioides                                                 | 39.7                 | ND                     | Acarbose (626.3)           | (Xiao et al. 2016)                |                          |
| 146 | Hypermonone E                                            | Hypericum monogynum                                                          | 781.2                | ND                     | Acarbose (233)             | (Zeng et al. 2018)                |                          |
| 147 | Dioxyduraflavone A                                       | Morus alba                                                                   | 25.27                | ND                     | 1-Deoxyojirimycin (85.29)  | (Li et al. 2018)                  |                          |
| 148 | Sanggenon V                                              | Morus alba                                                                   | 2.89                 | ND                     | 1-Deoxyojirimycin (85.29)  | (Li et al. 2018)                  |                          |
| 149 | Morusignin L                                             | Morus alba                                                                   | 23.2                 | ND                     | 1-Deoxyojirimycin (85.29)  | (Li et al. 2018)                  |                          |
| 150 | Licoflavone C                                            | Morus alba                                                                   | 78.8                 | ND                     | 1-Deoxyojirimycin (85.29)  | (Li et al. 2018)                  |                          |
| 151 | Albanin T                                                | Morus alba                                                                   | 11.04                | ND                     | Acarbose (203.97)          | (Ha et al. 2018)                  |                          |
| 152 | 5'-(1'',1''-dimethylallyl)-5,7,2',4'-tetrahydroxyflavone | Morus alba                                                                   | 8.7                  | ND                     | Acarbose (203.97)          | (Ha et al. 2018)                  |                          |
| 153 | 5'-geranyl-5,7,2',4'-tetrahydroxy-flavone                | Morus alba                                                                   | 18.31                | ND                     | Acarbose (203.97)          | (Ha et al. 2018)                  |                          |
| 154 | Albanin A                                                | Morus alba                                                                   | 100.96               | ND                     | Acarbose (203.97)          | (Ha et al. 2018)                  |                          |
| 155 | Morusinol                                                | Morus alba                                                                   | 65.27                | ND                     | Acarbose (203.97)          | (Ha et al. 2018)                  |                          |
| 156 | Albanin C                                                | Morus alba                                                                   | 12.04                | ND                     | Acarbose (203.97)          | (Ha et al. 2018)                  |                          |
| 157 | Kuwanon C                                                | Morus alba                                                                   | 11.85                | ND                     | Acarbose (203.97)          | (Ha et al. 2018)                  |                          |
| 158 | Morusalbin A                                             | Morus alba                                                                   | 4.53                 | ND                     | Acarbose (203.97)          | (Ha et al. 2018)                  |                          |
| 159 | Morusalbin B                                             | Morus alba                                                                   | 5.07                 | ND                     | Acarbose (203.97)          | (Ha et al. 2018)                  |                          |
| 160 | Morusalbin C                                             | Morus alba                                                                   | 5.4                  | ND                     | Acarbose (203.97)          | (Ha et al. 2018)                  |                          |
| 161 | Morusalbin D                                             | Morus alba                                                                   | 3.55                 | Competitive inhibition | Acarbose (203.97)          | (Ha et al. 2018)                  |                          |
| 162 | Macrourin I                                              | Morus macrourea                                                              | 1.7                  | ND                     | Acarbose (1428)            | (Wang et al. 2018)                |                          |
| 163 | Macrourin J                                              | Morus macrourea                                                              | 1.58                 | ND                     | Acarbose (1428)            | (Wang et al. 2018)                |                          |
| 164 | Wittiorumin F                                            | Morus macrourea                                                              | 1.89                 | ND                     | Acarbose (1428)            | (Wang et al. 2018)                |                          |
| 165 | Kuwanon J                                                | Morus macrourea                                                              | 2.17                 | ND                     | Acarbose (1428)            | (Wang et al. 2018)                |                          |
| 166 | Albafuran C                                              | Morus macrourea                                                              | 2.52                 | ND                     | Acarbose (1428)            | (Wang et al. 2018)                |                          |
| 167 | Mulberrofuran E                                          | Morus macrourea                                                              | 5.22                 | ND                     | Acarbose (1428)            | (Wang et al. 2018)                |                          |
| 168 | Mulberrofuran F                                          | Morus macrourea                                                              | 2.13                 | ND                     | Acarbose (1428)            | (Wang et al. 2018)                |                          |
| 169 | Sorocein I                                               | Morus macrourea                                                              | 1.47                 | ND                     | Acarbose (1428)            | (Wang et al. 2018)                |                          |

| No. | Classes         | Compound name                                                               | Plant source                                  | IC50 (µM)               | Mode of inhibition    | IC50 of the positive control (µM) | References          |                     |
|-----|-----------------|-----------------------------------------------------------------------------|-----------------------------------------------|-------------------------|-----------------------|-----------------------------------|---------------------|---------------------|
| 170 | Stilbenes       | Paeonilactiflorol                                                           | Paeonia lactiflora                            | 13.57                   | ND                    | Acarbose (149.00)                 | (Zhang et al. 2019) |                     |
| 171 |                 | Trans-resveratrol                                                           | Paeonia lactiflora                            | 123.39                  | ND                    | Acarbose (149.00)                 | (Zhang et al. 2019) |                     |
| 172 |                 | Cis-ε-viniferin                                                             | Paeonia lactiflora                            | 86.65                   | ND                    | Acarbose (149.00)                 | (Zhang et al. 2019) |                     |
| 173 |                 | Trans-ε-viniferin                                                           | Paeonia lactiflora                            | 43.91                   | ND                    | Acarbose (149.00)                 | (Zhang et al. 2019) |                     |
| 174 |                 | (-)-7a,8a-cis-ε-viniferin                                                   | Paeonia lactiflora                            | 59.16                   | ND                    | Acarbose (149.00)                 | (Zhang et al. 2019) |                     |
| 175 |                 | Carasiphenol A                                                              | Paeonia lactiflora                            | 32.88                   | ND                    | Acarbose (149.00)                 | (Zhang et al. 2019) |                     |
| 176 |                 | Trans-gnetin H                                                              | Paeonia lactiflora                            | 14.39                   | ND                    | Acarbose (149.00)                 | (Zhang et al. 2019) |                     |
| 177 |                 | Suffruticosol A                                                             | Paeonia lactiflora                            | 15.57                   | ND                    | Acarbose (149.00)                 | (Zhang et al. 2019) |                     |
| 178 |                 | Suffruticosol B                                                             | Paeonia lactiflora                            | 10.82                   | ND                    | Acarbose (149.00)                 | (Zhang et al. 2019) |                     |
| 179 |                 | Polygonumnolide D                                                           | Polygonum multiflorum                         | 2.4                     | ND                    | Acarbose (50.04)                  | (Yang et al. 2017)  |                     |
| 180 |                 | (E)-2,3,5,4'-tetrahydroxylstilbene-2-β-D-glucopyranoside                    | Polygonum multiflorum                         | 14.9                    | ND                    | Acarbose (50.04)                  | (Yang et al. 2017)  |                     |
| 181 |                 | (Z)-2,3,5,4'-tetrahydroxylstilbene-2-β-D-glucopyranoside                    | Polygonum multiflorum                         | 8.6                     | ND                    | Acarbose (50.04)                  | (Yang et al. 2017)  |                     |
| 182 |                 | (E)-2,3,5,4'-tetrahydroxylstilbene-2-β-D-(3''-Omonogalloylestere)-glucoside | Polygonum multiflorum                         | 11.1                    | ND                    | Acarbose (50.04)                  | (Yang et al. 2017)  |                     |
| 183 |                 | Cysetermerol A                                                              | Cynodon dactylon                              | 172.88                  | ND                    | Acarbose (104.13)                 | (Wang et al. 2019)  |                     |
| 184 |                 | Phenolic acids                                                              | Invonoid A                                    | Balanophora involucrate | 70.34                 | ND                                | Acarbose (505.79)   | (Wei et al. 2017a)  |
| 185 |                 |                                                                             | Invonoid B                                    | Balanophora involucrate | 92.63                 | ND                                | Acarbose (505.79)   | (Wei et al. 2017a)  |
| 186 |                 |                                                                             | Brevifolin carboxylic acid                    | Balanophora involucrate | 45.64                 | ND                                | Acarbose (505.79)   | (Wei et al. 2017a)  |
| 187 |                 |                                                                             | 7'R*-methoxy-7-epi-lariciresinol              | Taxus wallichiana       | 42.9                  | ND                                | Acarbose (215)      | (Dang et al. 2017b) |
| 188 |                 | Lignans                                                                     | 7'S*-methoxy-7-epilariciresinol               | Taxus wallichiana       | 170                   | ND                                | Acarbose (215)      | (Dang et al. 2017b) |
| 189 | α-conidendrin   |                                                                             | Taxus wallichiana                             | 194                     | ND                    | Acarbose (215)                    | (Dang et al. 2017b) |                     |
| 190 | Formosanol      |                                                                             | Taxus wallichiana                             | 35.3                    | ND                    | Acarbose (215)                    | (Dang et al. 2017b) |                     |
| 191 | (+)-tsugacetal  |                                                                             | Taxus wallichiana                             | 38.8                    | ND                    | Acarbose (215)                    | (Dang et al. 2017b) |                     |
| 192 | α-intermedianol |                                                                             | Taxus wallichiana                             | 133                     | ND                    | Acarbose (215)                    | (Dang et al. 2017b) |                     |
| 193 | Matairesinol    |                                                                             | Taxus wallichiana                             | 175                     | ND                    | Acarbose (215)                    | (Dang et al. 2017b) |                     |
| 194 | Oxomatairesinol |                                                                             | Taxus wallichiana                             | 79.1                    | ND                    | Acarbose (215)                    | (Dang et al. 2017b) |                     |
| 195 | Lanceolatanin C |                                                                             | Taxus wallichiana                             | 52.2                    | ND                    | Acarbose (215)                    | (Dang et al. 2017b) |                     |
| 196 | Lanceolatanin D |                                                                             | Taxus wallichiana                             | 135                     | ND                    | Acarbose (215)                    | (Dang et al. 2017b) |                     |
| 197 | Tannins         |                                                                             | 1,2,3-tri-O-galloyl-6-O-cinnamoyl-β-D-glucose | Terminalia chebula      | 14.7                  | ND                                | Acarbose (174.0)    | (Lee et al. 2017)   |
| 198 |                 | 1,2,3,6-tetra-O-galloyl-4-O-cinnamoyl-β-D-glucose                           | Terminalia chebula                            | 2.9                     | Mixed-type inhibition | Acarbose (174.0)                  | (Lee et al. 2017)   |                     |
| 199 |                 | 1,6-di-O-galloyl-2-O-cinnamoyl-β-D-glucose                                  | Terminalia chebula                            | 46.1                    | ND                    | Acarbose (174.0)                  | (Lee et al. 2017)   |                     |
| 200 |                 | 1,2-di-O-galloyl-6-O-cinnamoyl-β-D-glucose                                  | Terminalia chebula                            | 68.4                    | ND                    | Acarbose (174.0)                  | (Lee et al. 2017)   |                     |
| 201 |                 | 1,2,3,6-tetra-O-galloyl-β-D-glucose                                         | Terminalia chebula                            | 15.5                    | ND                    | Acarbose (174.0)                  | (Lee et al. 2017)   |                     |
| 202 |                 | 1,2,3,4,6-penta-O-galloyl-β-D-glucose                                       | Terminalia chebula                            | 8.3                     | ND                    | Acarbose (174.0)                  | (Lee et al. 2017)   |                     |
| 203 |                 | 4-O-(2'',4''-di-O-galloyl-α-L-rhamnosyl) ellagic acid                       | Terminalia chebula                            | 6.4                     | Mixed-type inhibition | Acarbose (174.0)                  | (Lee et al. 2017)   |                     |
| 204 |                 | 4-O-(4''-O-galloyl-α-L-rhamnosyl) ellagic acid                              | Terminalia chebula                            | 37.9                    | ND                    | Acarbose (174.0)                  | (Lee et al. 2017)   |                     |
| 205 |                 | 4-O-(3'',4''-di-O-galloyl-α-L-rhamnosyl) ellagic acid                       | Terminalia chebula                            | 12.3                    | ND                    | Acarbose (174.0)                  | (Lee et al. 2017)   |                     |



| No. | Classes                                                                     | Compound name                                               | Plant source                                                | IC50 (µM)           | Mode of inhibition | IC50 of the positive control (µM) | References           |
|-----|-----------------------------------------------------------------------------|-------------------------------------------------------------|-------------------------------------------------------------|---------------------|--------------------|-----------------------------------|----------------------|
| 206 | Anthraquinones                                                              | 8-hydroxy-1,2,6,7-tetramethoxy-3-methylanthraquinone        | Cassia obtusifolia                                          | 460.36              | ND                 | Acarbose (< 7.822)                | (Luo et al. 2019)    |
| 207 |                                                                             | 1,6,8-trihydroxy-2,7-dimethoxy-3-methylanthraquinone        | Cassia obtusifolia                                          | 364.5               | ND                 | Acarbose (< 7.822)                | (Luo et al. 2019)    |
| 208 |                                                                             | 7-methoxy obtusifolin                                       | Cassia obtusifolia                                          | 634.17              | ND                 | Acarbose (< 7.822)                | (Luo et al. 2019)    |
| 209 |                                                                             | Chrysophanol                                                | Cassia obtusifolia                                          | 200                 | ND                 | Acarbose (< 7.822)                | (Luo et al. 2019)    |
| 210 |                                                                             | Physicon                                                    | Cassia obtusifolia                                          | 79.47               | ND                 | Acarbose (< 7.822)                | (Luo et al. 2019)    |
| 211 |                                                                             | Obtusifolin                                                 | Cassia obtusifolia                                          | 508.83              | ND                 | Acarbose (< 7.822)                | (Luo et al. 2019)    |
| 212 |                                                                             | Aurantio-obtusin                                            | Cassia obtusifolia                                          | 326.41              | ND                 | Acarbose (< 7.822)                | (Luo et al. 2019)    |
| 213 |                                                                             | Questin                                                     | Cassia obtusifolia                                          | 414.9               | ND                 | Acarbose (< 7.822)                | (Luo et al. 2019)    |
| 214 |                                                                             | Obtusin                                                     | Cassia obtusifolia                                          | 60.76               | ND                 | Acarbose (191.4)                  | (Jung et al. 2017)   |
| 215 |                                                                             | Emodin                                                      | Cassia obtusifolia                                          | 3.77                | ND                 | Acarbose (191.4)                  | (Jung et al. 2017)   |
| 216 |                                                                             | Chryso-obtusin                                              | Cassia obtusifolia                                          | 100.5               | ND                 | Acarbose (191.4)                  | (Jung et al. 2017)   |
| 217 |                                                                             | 2-Hydroxyemodin-1-methylether                               | Cassia obtusifolia                                          | 18.81               | ND                 | Acarbose (191.4)                  | (Jung et al. 2017)   |
| 218 |                                                                             | Depside derivatives                                         | Methyl 2-O-(4-hydroxybenzoyl)-2,4,6-trihydroxyphenylacetate | Impatiens balsamina | 28.77              | ND                                | Acarbose (5.20)      |
| 219 | Methyl 2-O-(4-hydroxybenzoyl)-4-O-β-D-glucopyranosyl-6-hydroxyphenylacetate |                                                             | Impatiens balsamina                                         | 30.8                | ND                 | Acarbose (5.20)                   | (Li et al. 2015)     |
| 220 | Butoxy-2-O-(4-hydroxybenzoyl)-4,6-dihydroxyphenylacetate                    |                                                             | Impatiens balsamina                                         | 2                   | ND                 | Acarbose (5.20)                   | (Li et al. 2015)     |
| 221 | Coumarins                                                                   | Dolichosin A                                                | Dolichos trilobus                                           | 19.5                | ND                 | Acarbose (163.6)                  | (Jiang et al. 2019)  |
| 222 |                                                                             | Isosojagol                                                  | Dolichos trilobus                                           | 32.2                | ND                 | Acarbose (163.6)                  | (Jiang et al. 2019)  |
| 223 |                                                                             | Phaseol                                                     | Dolichos trilobus                                           | 21.6                | ND                 | Acarbose (163.6)                  | (Jiang et al. 2019)  |
| 224 |                                                                             | 4'',5''-dehydroisopsoralidin                                | Dolichos trilobus                                           | 12                  | ND                 | Acarbose (163.6)                  | (Jiang et al. 2019)  |
| 225 |                                                                             | 7-[(E)-3',7'-dimethyl-6'-oxo-2',7'-octadienyl]oxy-coumarin  | Zanthoxylum schinifolium                                    | 161.6               | ND                 | Acarbose (121.5)                  | (Nguyen et al. 2016) |
| 226 |                                                                             | 7-(6'R-hydroxy-3',7'-dimethyl-2'E,7'-octadienyloxy)coumarin | Zanthoxylum schinifolium                                    | 78.2                | ND                 | Acarbose (121.5)                  | (Nguyen et al. 2016) |
| 227 |                                                                             | 7-[(E)-7'-hydroxy-3',7'-dimethyl-2',5'-dienyloxy]-coumarin  | Zanthoxylum schinifolium                                    | 164.4               | ND                 | Acarbose (121.5)                  | (Nguyen et al. 2016) |
| 228 |                                                                             | Collinin                                                    | Zanthoxylum schinifolium                                    | 92.1                | ND                 | Acarbose (121.5)                  | (Nguyen et al. 2016) |
| 229 |                                                                             | (E)-4-methyl-6-(coumarin-7'-yloxy)hex-4-enal                | Zanthoxylum schinifolium                                    | 90.6                | ND                 | Acarbose (121.5)                  | (Nguyen et al. 2016) |
| 230 |                                                                             | Paratrimerin E                                              | Paramignya trimera                                          | 106.9               | ND                 | Acarbose (214.5)                  | (Dang et al. 2017a)  |
| 231 |                                                                             | Ostruthin                                                   | Paramignya trimera                                          | 17.1                | ND                 | Acarbose (214.5)                  | (Dang et al. 2017a)  |
| 232 |                                                                             | Umbelliferone                                               | Paramignya trimera                                          | 32.4                | ND                 | Acarbose (214.5)                  | (Dang et al. 2017a)  |
| 233 |                                                                             | Scopoletin                                                  | Paramignya trimera                                          | 69                  | ND                 | Acarbose (214.5)                  | (Dang et al. 2017a)  |
| 234 |                                                                             | Ninhvanin                                                   | Paramignya trimera                                          | 84.6                | ND                 | Acarbose (214.5)                  | (Dang et al. 2017a)  |
| 235 |                                                                             | Xanthyletin                                                 | Paramignya trimera                                          | 37.5                | ND                 | Acarbose (214.5)                  | (Dang et al. 2017a)  |
| 236 |                                                                             | Pandanusin A                                                | Paramignya trimera                                          | 95.3                | ND                 | Acarbose (214.5)                  | (Dang et al. 2017a)  |
| 237 |                                                                             | Paratrimerin F                                              | Paramignya trimera                                          | 31.7                | ND                 | Acarbose (214.5)                  | (Dang et al. 2017a)  |

| No. | Classes          | Compound name         | Plant source                                                                                | IC50 (µM)                | Mode of inhibition         | IC50 of the positive control (µM) | References            |                       |
|-----|------------------|-----------------------|---------------------------------------------------------------------------------------------|--------------------------|----------------------------|-----------------------------------|-----------------------|-----------------------|
| 238 | Dianlyheptanoids | Tsaokopyranol A       | Amomum tsao-ko                                                                              | 169.5                    | ND                         | Acarbose (219.0)                  | (He et al. 2020)      |                       |
| 239 |                  | Tsaokopyranol B       | Amomum tsao-ko                                                                              | 154.5                    | ND                         | Acarbose (219.0)                  | (He et al. 2020)      |                       |
| 240 |                  | Tsaokopyranol C       | Amomum tsao-ko                                                                              | 472                      | ND                         | Acarbose (219.0)                  | (He et al. 2020)      |                       |
| 241 |                  | Tsaokopyranol D       | Amomum tsao-ko                                                                              | 100.1                    | ND                         | Acarbose (219.0)                  | (He et al. 2020)      |                       |
| 242 |                  | Tsaokopyranol E       | Amomum tsao-ko                                                                              | 89.6                     | ND                         | Acarbose (219.0)                  | (He et al. 2020)      |                       |
| 243 |                  | Tsaokopyranol F       | Amomum tsao-ko                                                                              | 116.5                    | ND                         | Acarbose (219.0)                  | (He et al. 2020)      |                       |
| 244 |                  | Tsaokopyranol G       | Amomum tsao-ko                                                                              | 460.4                    | ND                         | Acarbose (219.0)                  | (He et al. 2020)      |                       |
| 245 |                  | Tsaokopyranol H       | Amomum tsao-ko                                                                              | 59.4                     | ND                         | Acarbose (219.0)                  | (He et al. 2020)      |                       |
| 246 |                  | Tsaokopyranol I       | Amomum tsao-ko                                                                              | 67.3                     | ND                         | Acarbose (219.0)                  | (He et al. 2020)      |                       |
| 247 |                  | Tsaokopyranol J       | Amomum tsao-ko                                                                              | 65.6                     | ND                         | Acarbose (219.0)                  | (He et al. 2020)      |                       |
| 248 |                  | Tsaokopyranol K       | Amomum tsao-ko                                                                              | 97                       | ND                         | Acarbose (219.0)                  | (He et al. 2020)      |                       |
| 249 |                  | Tsaokopyranol L       | Amomum tsao-ko                                                                              | 1042                     | Non-competitive inhibition | Acarbose (219.0)                  | (He et al. 2020)      |                       |
| 250 |                  | Tsaokopyranol M       | Amomum tsao-ko                                                                              | 853                      | Non-competitive inhibition | Acarbose (219.0)                  | (He et al. 2020)      |                       |
| 251 |                  |                       | (2R,6S)-3,4-dehydro-1,7-bis(4-hydroxy phenyl)-4'-de-O-methyl centrolobine                   | Amomum tsao-ko           | 248                        | ND                                | Acarbose (219.0)      | (He et al. 2020)      |
| 252 |                  |                       | (2R,6R)-3,4-dehydro-4'-de-O-methyl centrolobin                                              | Amomum tsao-ko           | 457                        | ND                                | Acarbose (219.0)      | (He et al. 2020)      |
| 253 |                  | Phaeoheptanoxide      | Amomum tsao-ko                                                                              | 68.6                     | ND                         | Acarbose (219.0)                  | (He et al. 2020)      |                       |
| 254 |                  | Engelheptanoxides C   | Amomum tsao-ko                                                                              | 179.5                    | ND                         | Acarbose (219.0)                  | (He et al. 2020)      |                       |
| 255 | Xanthones        | Fuscaxanthon J        | Garcinia fusca                                                                              | 8.3                      | ND                         | Acarbose (214.5)                  | (Nguyen et al. 2017b) |                       |
| 256 |                  | Fuscaxanthon K        | Garcinia fusca                                                                              | 62.3                     | ND                         | Acarbose (214.5)                  | (Nguyen et al. 2017b) |                       |
| 257 |                  | Cowanin               | Garcinia fusca                                                                              | 20.7                     | ND                         | Acarbose (214.5)                  | (Nguyen et al. 2017b) |                       |
| 258 |                  | Cowanol               | Garcinia fusca                                                                              | 168.7                    | ND                         | Acarbose (214.5)                  | (Nguyen et al. 2017b) |                       |
| 259 |                  | Cowagarcinione E      | Garcinia fusca                                                                              | 16.9                     | ND                         | Acarbose (214.5)                  | (Nguyen et al. 2017b) |                       |
| 260 |                  |                       | 1,3-dihydroxy-6,7-dimethoxy-2,8-diprenylxanthone                                            | Garcinia fusca           | 18.2                       | ND                                | Acarbose (214.5)      | (Nguyen et al. 2017b) |
| 261 |                  |                       | α-mangostin                                                                                 | Garcinia fusca           | 11.4                       | ND                                | Acarbose (214.5)      | (Nguyen et al. 2017b) |
| 262 |                  |                       | 1,3-dihydroxy-2-(2-hydroxy-3-methylbut-3-enyl)-6,7-dimethoxy-8-(3-methylbut-2-enyl)xanthone | Garcinia fusca           | 94.3                       | ND                                | Acarbose (214.5)      | (Nguyen et al. 2017b) |
| 263 |                  |                       | Garbogiol                                                                                   | Garcinia fusca           | 21.2                       | ND                                | Acarbose (214.5)      | (Nguyen et al. 2017b) |
| 264 |                  |                       | Cowaxanthone                                                                                | Garcinia fusca           | 43.7                       | ND                                | Acarbose (214.5)      | (Nguyen et al. 2017b) |
| 265 |                  |                       | Garciniacowones H                                                                           | Garcinia cowa            | 25.4                       | ND                                | Acarbose (80.0)       | (Raksat et al. 2019)  |
| 266 |                  |                       | Garciniacowones I                                                                           | Garcinia cowa            | 15.4                       | ND                                | Acarbose (80.0)       | (Raksat et al. 2019)  |
| 267 |                  |                       | Garciniacowones J                                                                           | Garcinia cowa            | 76.2                       | ND                                | Acarbose (80.0)       | (Raksat et al. 2019)  |
| 268 |                  |                       | Oblongixanthone G                                                                           | Garcinia oblongifolia    | 9.4                        | ND                                | Acarbose (900)        | (Trinh et al. 2017)   |
| 269 |                  |                       | Oblongixanthone H                                                                           | Garcinia oblongifolia    | 21.2                       | ND                                | Acarbose (900)        | (Trinh et al. 2017)   |
| 270 | Alkaloids        | Paramiacridone        | Paramignya trimera                                                                          | 62.5                     | ND                         | Acarbose (223.0)                  | (Trinh et al. 2020)   |                       |
| 271 |                  | 5-hydroxynoracronycin | Paramignya trimera                                                                          | 14.5                     | ND                         | Acarbose (223.0)                  | (Trinh et al. 2020)   |                       |
| 272 |                  | Glycocitrin III       | Paramignya trimera                                                                          | 101.4                    | ND                         | Acarbose (223.0)                  | (Trinh et al. 2020)   |                       |
| 273 |                  |                       | 3-heptyl-2-methylisoquinolin-1(2H)-one                                                      | Zanthoxylum schinifolium | 82.4                       | ND                                | Acarbose (121.5)      | (Nguyen et al. 2016)  |
| 274 |                  |                       | Vindogentianine                                                                             | Catharanthus roseus      | 427.44                     | ND                                | Acarbose (256.11)     | (Tiong et al. 2015)   |
| 275 |                  | Utilisin              | Echinochloa utilis                                                                          | 84.7                     | ND                         | Acarbose (125.2)                  | (Nguyen et al. 2017c) |                       |

| No. | Classes | Compound name                                                                    | Plant source       | IC50 (µM) | Mode of inhibition | IC50 of the positive control (µM) | References            |
|-----|---------|----------------------------------------------------------------------------------|--------------------|-----------|--------------------|-----------------------------------|-----------------------|
| 276 | Amides  | Mariamide A                                                                      | Silybum marianum   | 1.5       | ND                 | Acarbose ( 2.68)                  | (Qin et al. 2017)     |
| 277 |         | Mariamide B                                                                      | Silybum marianum   | 20.24     | ND                 | Acarbose ( 2.68)                  | (Qin et al. 2017)     |
| 278 |         | 4-hydroxy-N-{4-[(E)-3-(4-hydroxy-3-methoxyphenyl) prop-2-enamido]butyl}benzamide | Silybum marianum   | 55.95     | ND                 | Acarbose ( 2.68)                  | (Qin et al. 2017)     |
| 279 |         | 4-hydroxy-N-{4-[3-(4-hydroxy-phenyl)-E-acryloylamino]-butyl}-benzamide           | Silybum marianum   | 5.3       | ND                 | Acarbose ( 2.68)                  | (Qin et al. 2017)     |
| 280 |         | N, N-1,4-butanediylbis(4-hydroxy-benzamide)                                      | Silybum marianum   | 35.21     | ND                 | Acarbose ( 2.68)                  | (Qin et al. 2017)     |
| 281 |         | 4,4'-diphenylmethane-bis(methyl) carbamates                                      | Silybum marianum   | 26.92     | ND                 | Acarbose ( 2.68)                  | (Qin et al. 2017)     |
| 282 |         | N-(p-coumaroyl) serotonin                                                        | Echinochloa utilis | 40.9      | ND                 | Acarbose (125.2 )                 | (Nguyen et al. 2017c) |

<sup>a</sup>ND, not determined

<sup>b</sup>Inhibitory activity of flavanols (structures 117-127) was toward sucrose

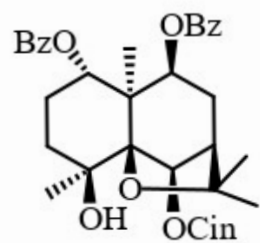

1

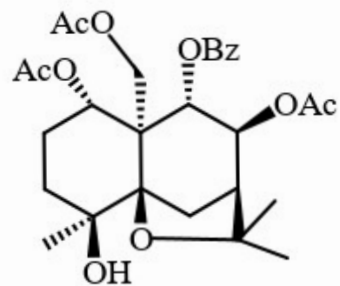

2

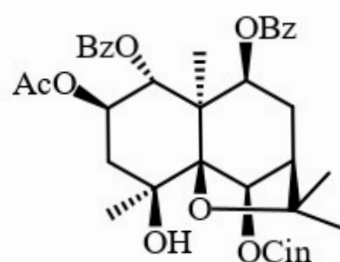

3

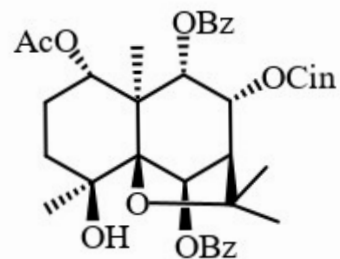

4

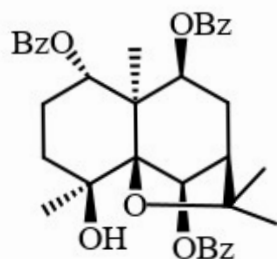

5

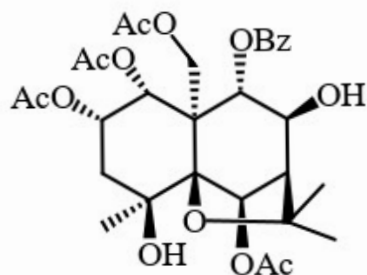

6

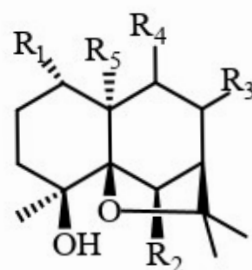

11

|    | $R_1$ | $R_2$ | $R_3$        | $R_4$         | $R_5$     |
|----|-------|-------|--------------|---------------|-----------|
| 7  | OAc   | OAc   | $\beta$ -OAc | $\alpha$ -OBz | $CH_2OAc$ |
| 8  | OAc   | OBz   | $\beta$ -OAc | $\beta$ -OBz  | $CH_3$    |
| 9  | OAc   | OBz   | $\alpha$ -OH | $\alpha$ -OBz | $CH_3$    |
| 10 | OBz   | OAc   | $\alpha$ -OH | $\beta$ -OBz  | $CH_3$    |

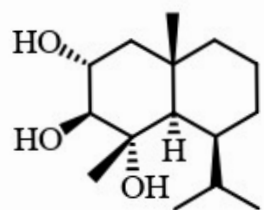

12

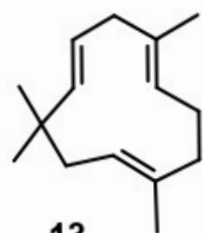

13

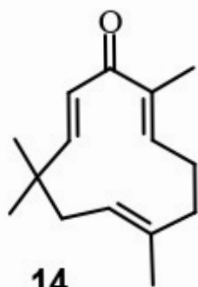

14

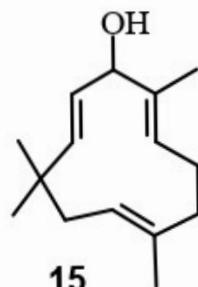

15

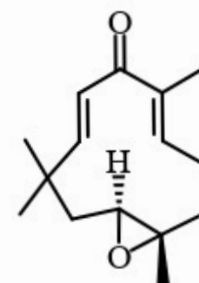

16

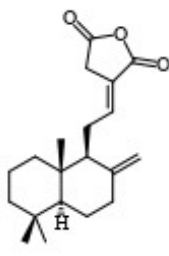

17

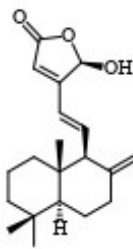

18

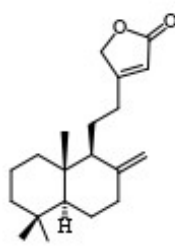

19

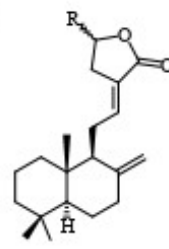

R

20: H  
21: -OCH<sub>3</sub>  
22: -OCH<sub>2</sub>CH<sub>3</sub>

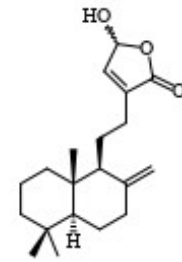

23

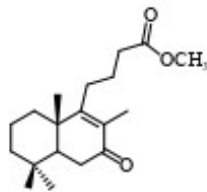

24

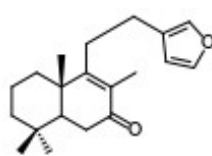

25

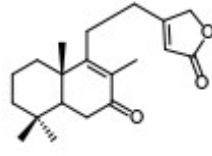

26

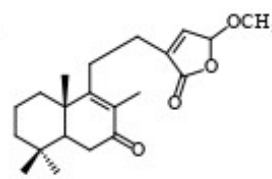

27

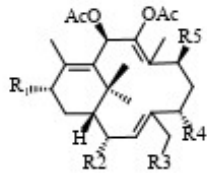

|     | R <sub>1</sub> | R <sub>2</sub> | R <sub>3</sub> | R <sub>4</sub> | R <sub>5</sub> |
|-----|----------------|----------------|----------------|----------------|----------------|
| 28: | OAc            | OAc            | OH             | MAPS           | OAc            |
| 29: | OH             | OH             | OH             | OH             | OAc            |
| 30: | OH             | OAc            | OAc            | OBz            | OAc            |

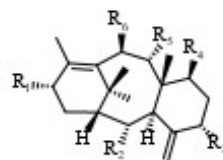

|     | R <sub>1</sub> | R <sub>2</sub> | R <sub>3</sub> | R <sub>4</sub> | R <sub>5</sub> | R <sub>6</sub> |
|-----|----------------|----------------|----------------|----------------|----------------|----------------|
| 31: | OAc            | OAc            | OH             | OH             | OAc            | OAc            |
| 32: | OAc            | OAc            | OH             | OAc            | OH             | OAc            |

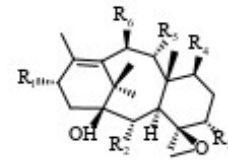

|     | R <sub>1</sub> | R <sub>2</sub> | R <sub>3</sub> | R <sub>4</sub> | R <sub>5</sub> | R <sub>6</sub> |
|-----|----------------|----------------|----------------|----------------|----------------|----------------|
| 33: | OAc            | OAc            | OH             | OAc            | OH             | OAc            |

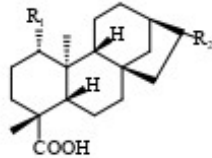

|     | R <sub>1</sub> | R <sub>2</sub>                        |
|-----|----------------|---------------------------------------|
| 34: | OAc            | =CH <sub>2</sub>                      |
| 35: | OH             | =CH <sub>2</sub>                      |
| 36: | OAc            | =CH <sub>2</sub> , Δ <sup>11,12</sup> |
| 37: | OAc            | α-CHO                                 |
| 38: | OAc            | CHO, Δ <sup>15,16</sup>               |

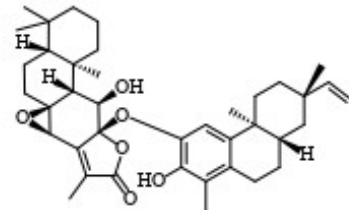

39

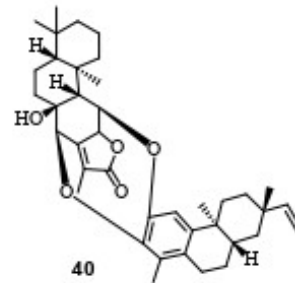

40

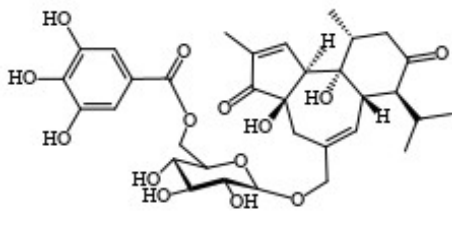

41

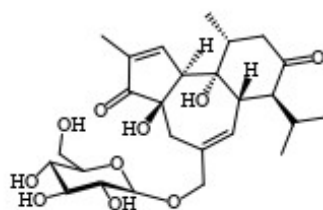

42

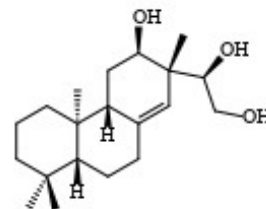

43

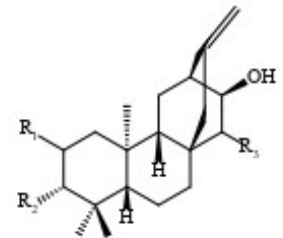

|     | R <sub>1</sub> | R <sub>2</sub> | R <sub>3</sub> |
|-----|----------------|----------------|----------------|
| 44: | H              | =O             | H              |
| 45: | =O             | OH             | =O             |

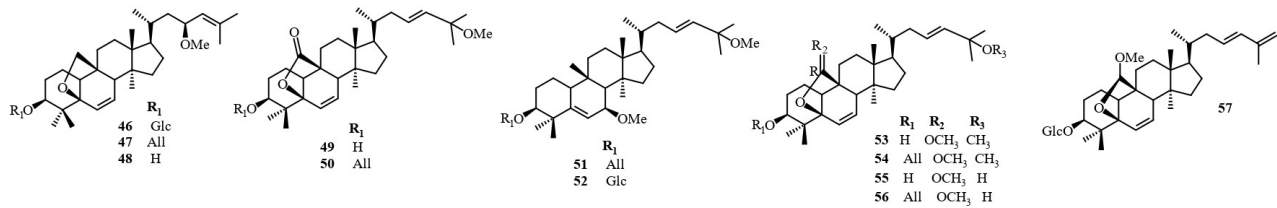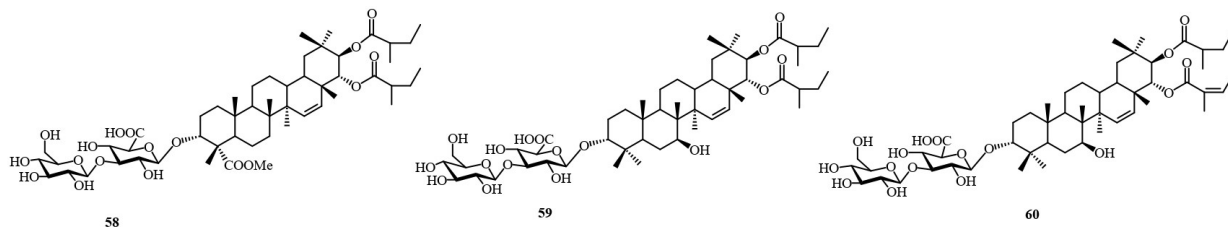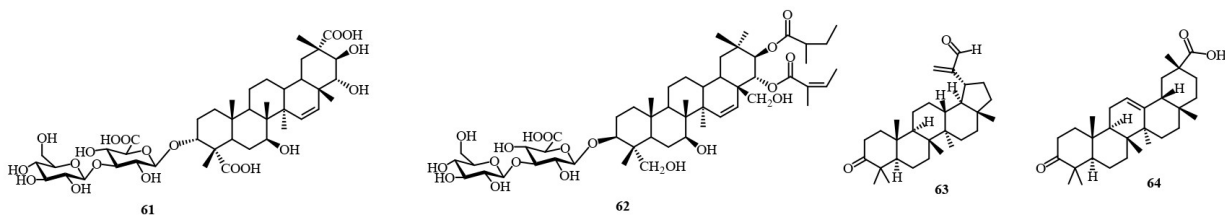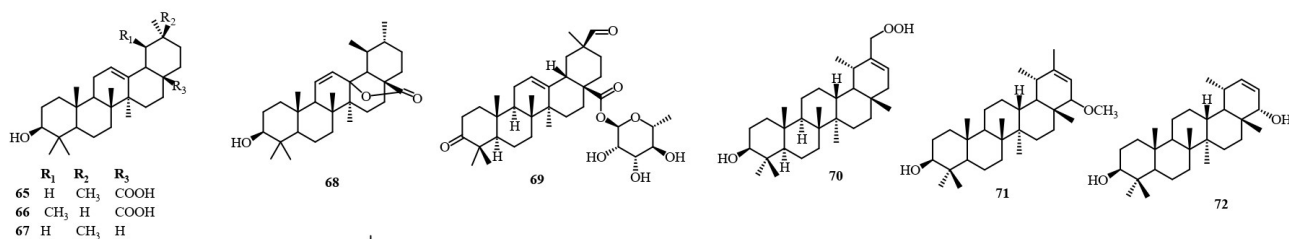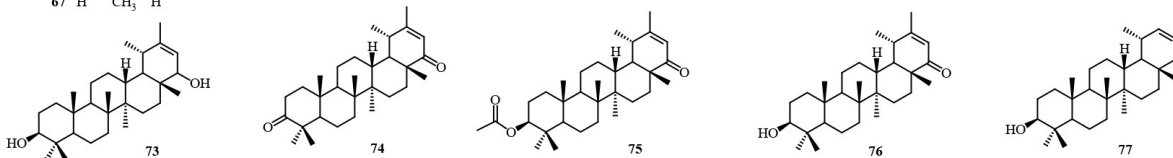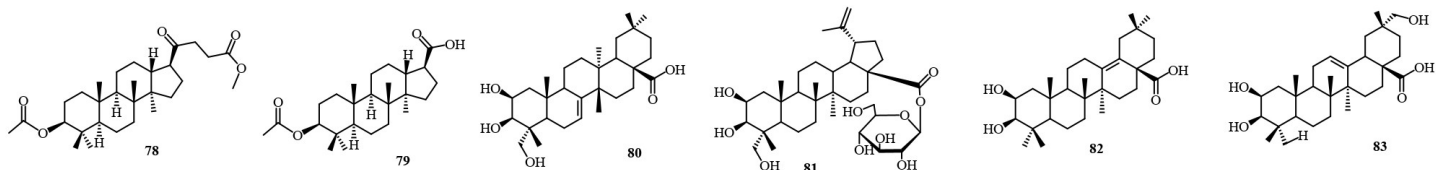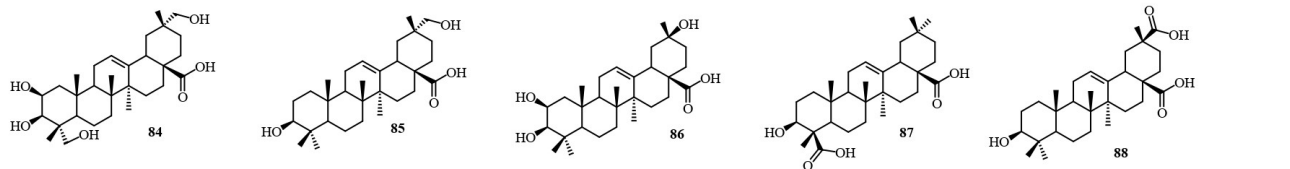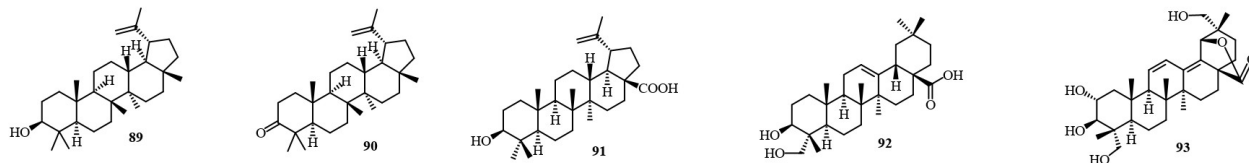

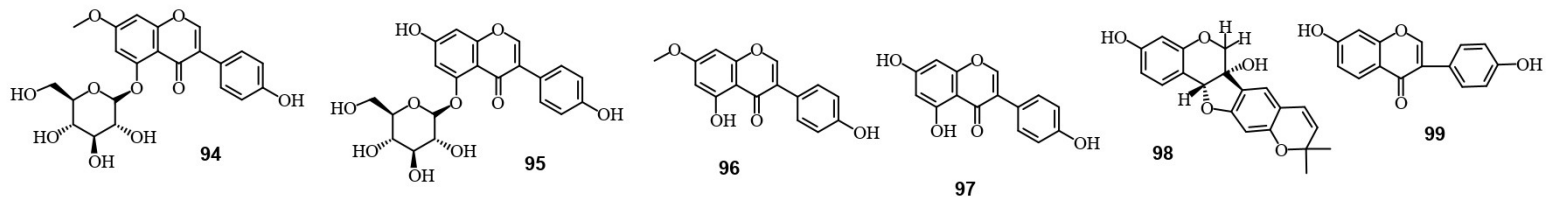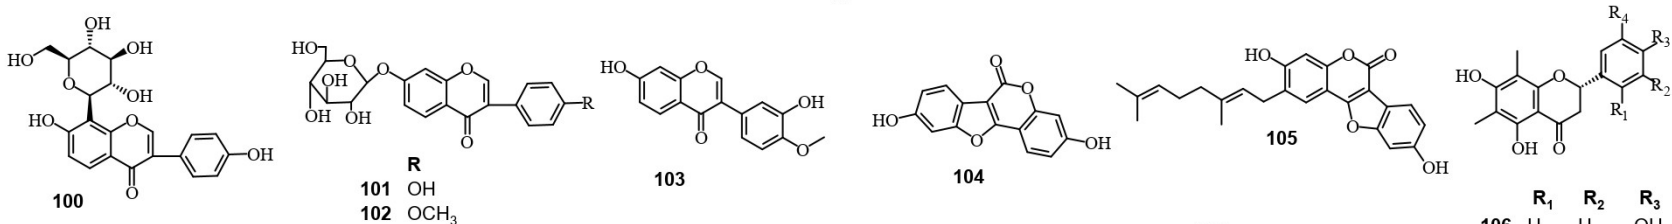

|     | R <sub>1</sub> | R <sub>2</sub> | R <sub>3</sub>   | R <sub>4</sub>   |
|-----|----------------|----------------|------------------|------------------|
| 106 | H              | H              | OH               | H                |
| 107 | OH             | H              | H                | H                |
| 108 | H              | H              | OCH <sub>3</sub> | H                |
| 109 | OH             | H              | H                | OCH <sub>3</sub> |
| 110 | H              | OH             | OCH <sub>3</sub> | H                |
| 111 | H              | OH             | OH               | H                |

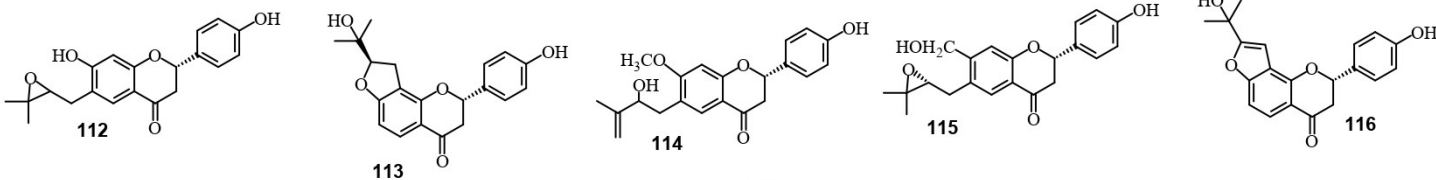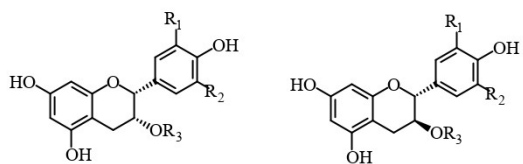

|     | R <sub>1</sub> | R <sub>2</sub> | R <sub>3</sub> |
|-----|----------------|----------------|----------------|
| 117 | OH             | H              | (E)-Coumaroyl  |
| 118 | OH             | H              | (E)-Caffeoyl   |
| 119 | OH             | H              | Galloyl        |
| 120 | H              | H              | Galloyl        |
| 121 | OH             | OH             | H              |
| 122 | OH             | OH             | Galloyl        |

|     | R <sub>1</sub> | R <sub>2</sub> | R <sub>3</sub> |
|-----|----------------|----------------|----------------|
| 123 | OH             | OH             | H              |
| 124 | OH             | H              | Galloyl        |
| 125 | H              | H              | Galloyl        |
| 126 | OH             | OH             | H              |
| 127 | OH             | OH             | Galloyl        |

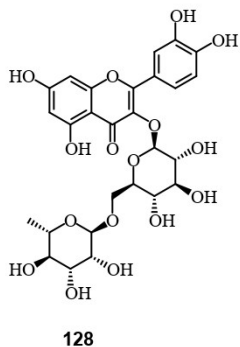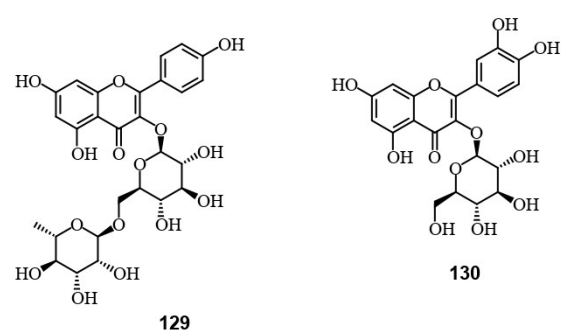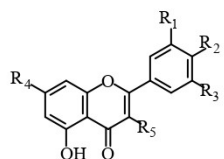

|     | R <sub>1</sub> | R <sub>2</sub> | R <sub>3</sub> | R <sub>4</sub> | R <sub>5</sub>               |
|-----|----------------|----------------|----------------|----------------|------------------------------|
| 132 | OH             | OH             | H              | OH             | OH                           |
| 133 | OH             | OH             | H              | OH             | O-Rhamnoside                 |
| 134 | OH             | OH             | OH             | OH             | OH                           |
| 135 | OH             | OH             | OH             | OH             | O-Rhamnoside                 |
| 136 | H              | OH             | H              | OH             | O-Rhamnoside                 |
| 137 | OH             | OH             | OH             | OH             | O-(4''-O-Galloyl)-rhamnoside |

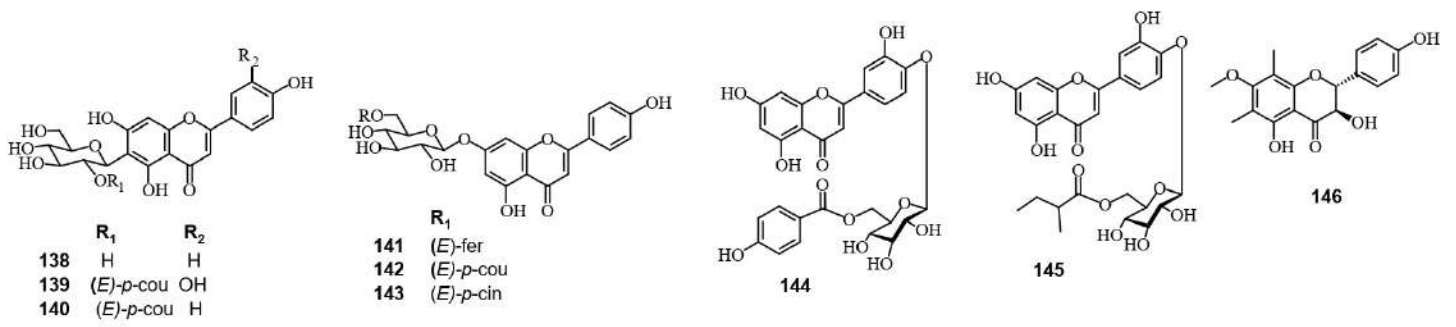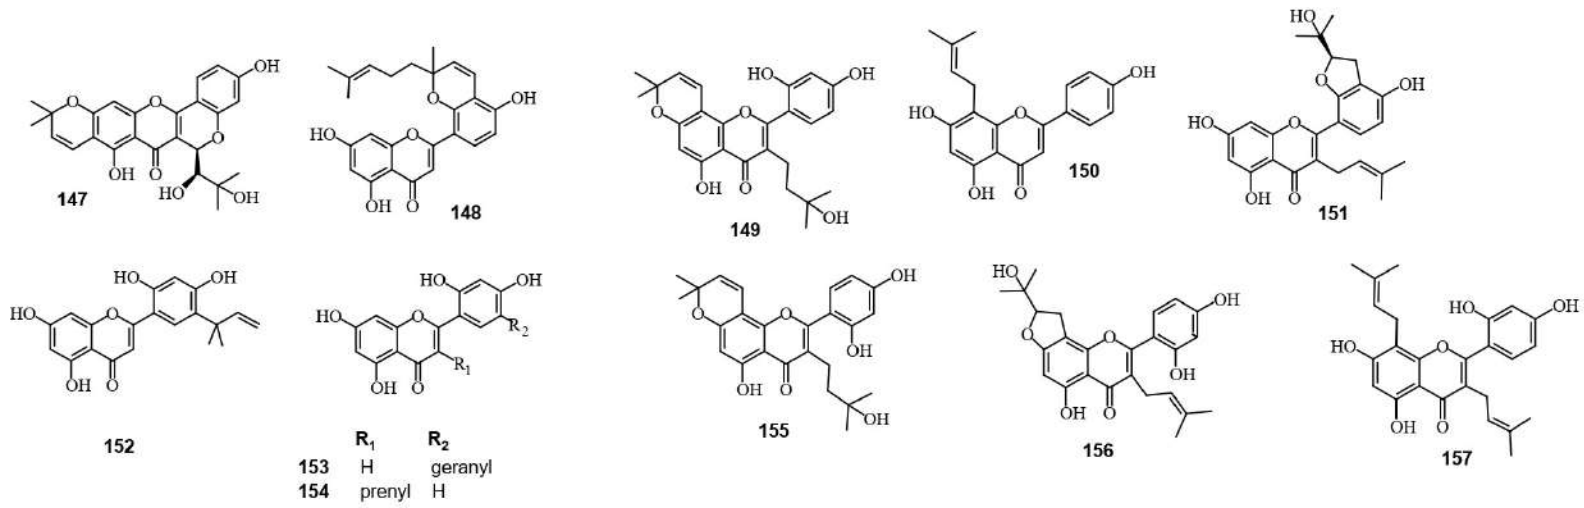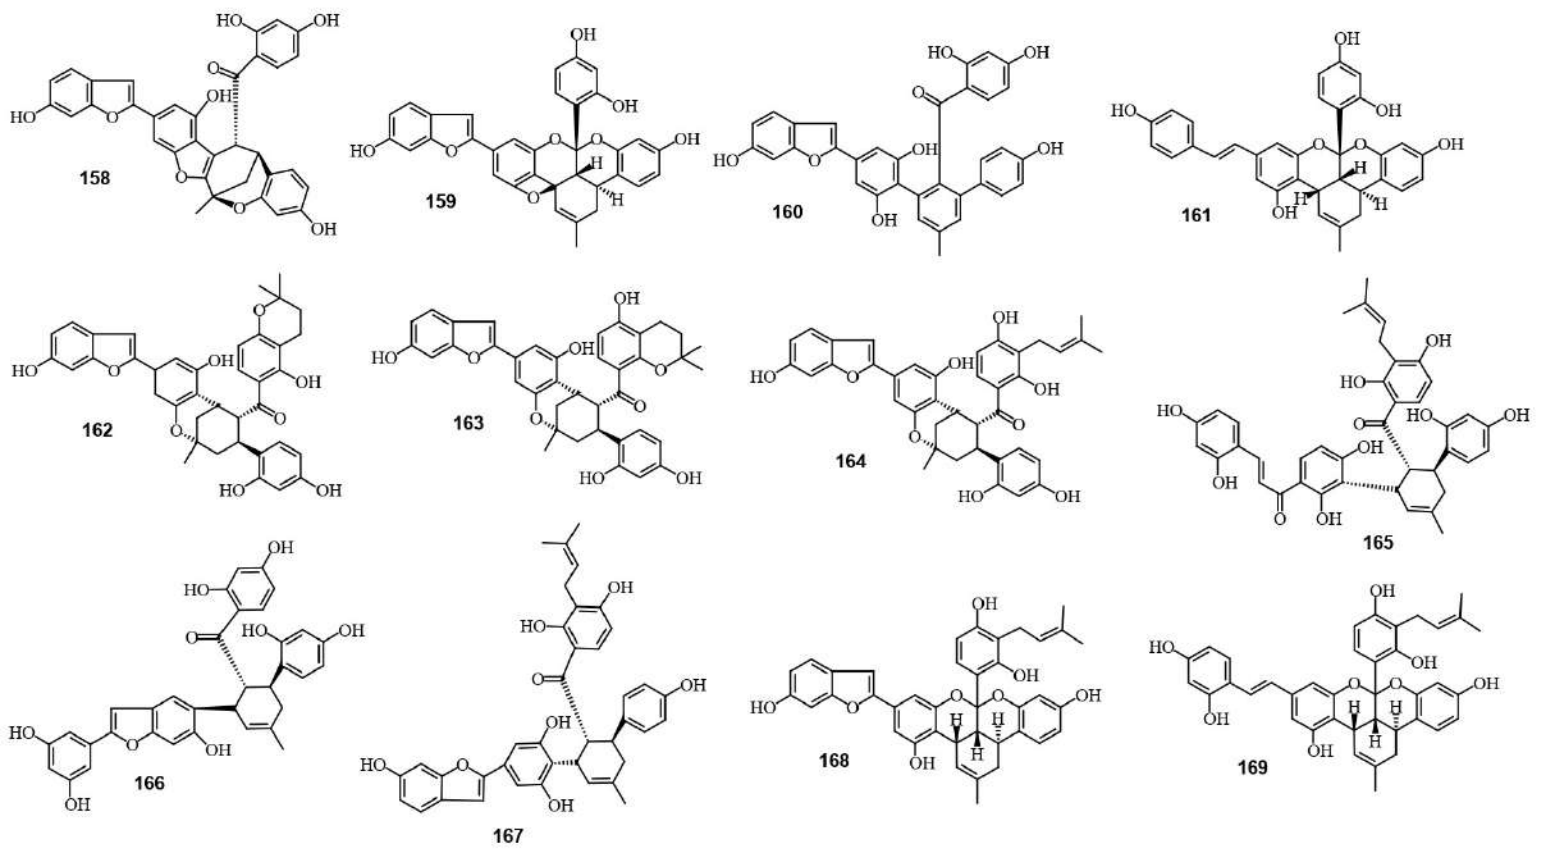



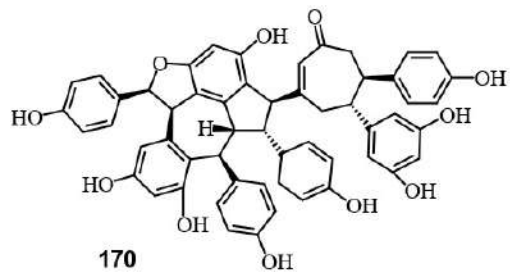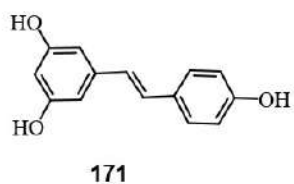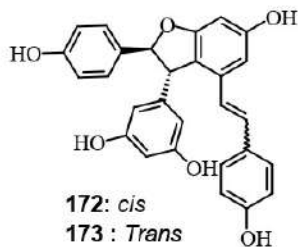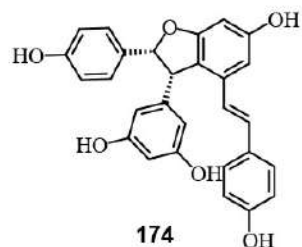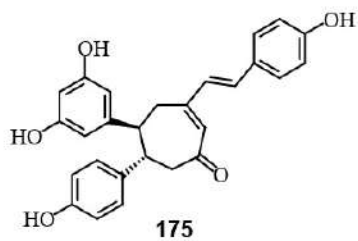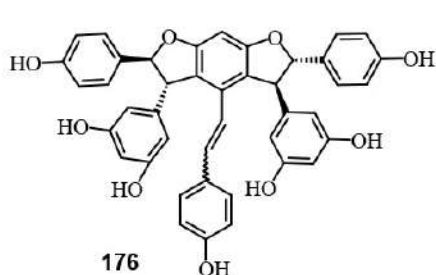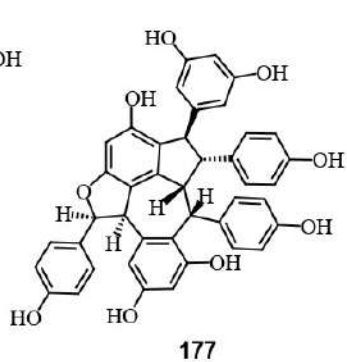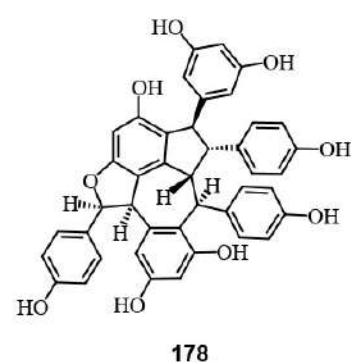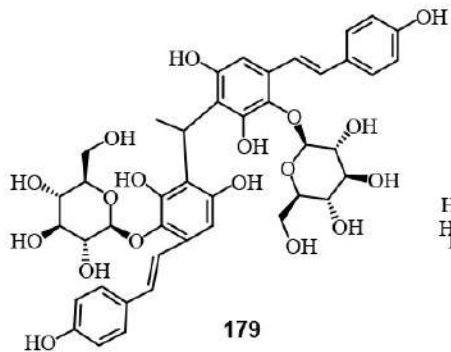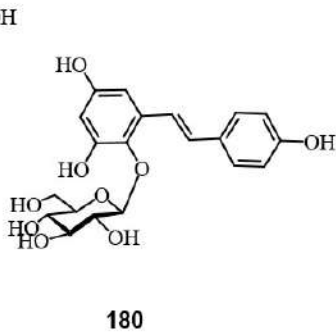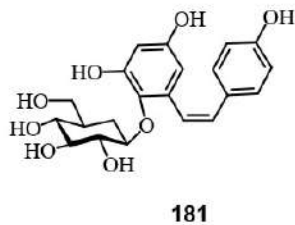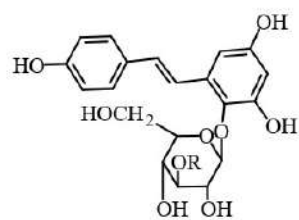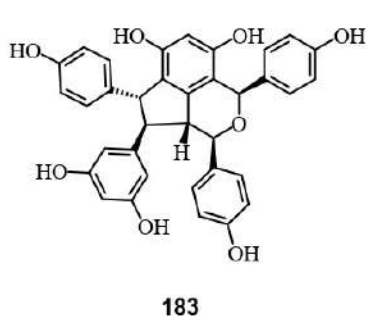

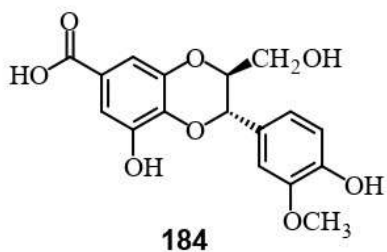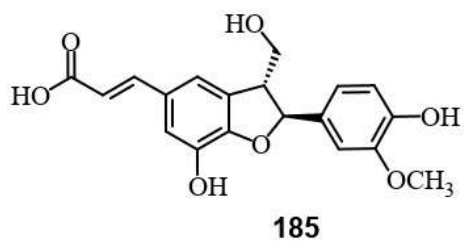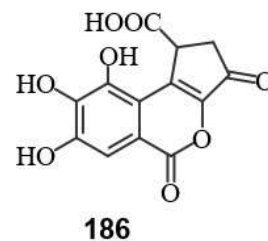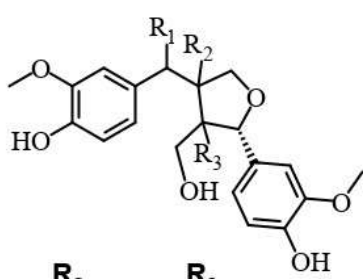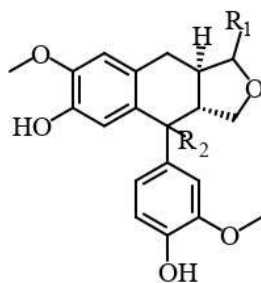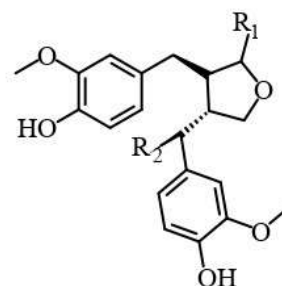

**187:** (*R*<sup>\*</sup>)-OCH<sub>3</sub>    beta-H    beta-H

**188:** (*S*<sup>\*</sup>)-OCH<sub>3</sub>    beta-H    beta-H

**189:** =O                    alpha-H  
**190:** alpha-OCH<sub>3</sub>      alpha-H  
**191:** beta-OCH<sub>3</sub>      alpha-H

**192:** *alpha*-OCH<sub>3</sub>      *beta*-OCH<sub>3</sub>  
**193:** =O                    H  
**194:** =O                    =O

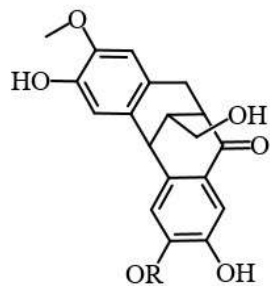

**195:** Me

**196:** H

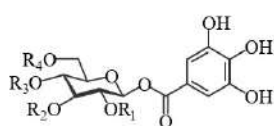

|             | R <sub>1</sub> | R <sub>2</sub> | R <sub>3</sub> | R <sub>4</sub> |
|-------------|----------------|----------------|----------------|----------------|
| <b>197:</b> | Gal            | Gal            | H              | Cin            |
| <b>198:</b> | Gal            | Gal            | Cin            | Gal            |
| <b>199:</b> | Cin            | H              | H              | Gal            |
| <b>200:</b> | Gal            | H              | H              | Cin            |
| <b>201:</b> | Gal            | Gal            | H              | Gal            |
| <b>202:</b> | Gal            | Gal            | Gal            | Gal            |

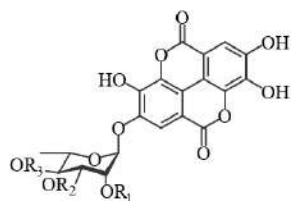

|             | R <sub>1</sub> | R <sub>2</sub> | R <sub>3</sub> |
|-------------|----------------|----------------|----------------|
| <b>203:</b> | Gal            | H              | Gal            |
| <b>204:</b> | H              | H              | Gal            |
| <b>205:</b> | H              | Gal            | Gal            |

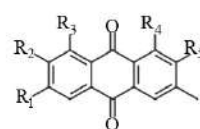

|             | R <sub>1</sub>   | R <sub>2</sub>   | R <sub>3</sub>   | R <sub>4</sub>   | R <sub>5</sub>   |
|-------------|------------------|------------------|------------------|------------------|------------------|
| <b>206:</b> | OCH <sub>3</sub> | OCH <sub>3</sub> | OH               | OCH <sub>3</sub> | OCH <sub>3</sub> |
| <b>207:</b> | OH               | OCH <sub>3</sub> | OH               | OH               | OCH <sub>3</sub> |
| <b>208:</b> | H                | OCH <sub>3</sub> | OH               | OCH <sub>3</sub> | OH               |
| <b>209:</b> | H                | H                | OH               | OH               | H                |
| <b>210:</b> | OCH <sub>3</sub> | H                | OH               | OH               | H                |
| <b>211:</b> | H                | H                | OH               | OCH <sub>3</sub> | OH               |
| <b>212:</b> | OH               | OCH <sub>3</sub> | OH               | OCH <sub>3</sub> | OH               |
| <b>213:</b> | OH               | H                | OCH <sub>3</sub> | OH               | H                |

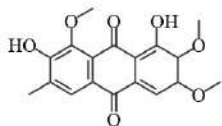

**214**

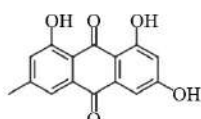

**215**

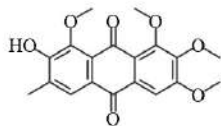

**216**

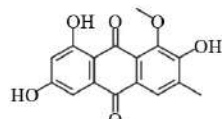

**217**

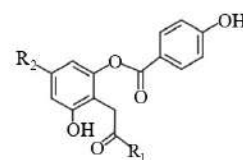

|             | R <sub>1</sub>                                   | R <sub>2</sub> |
|-------------|--------------------------------------------------|----------------|
| <b>218:</b> | OCH <sub>3</sub>                                 | OH             |
| <b>219:</b> | OCH <sub>3</sub>                                 | OGlu           |
| <b>220:</b> | O(CH <sub>2</sub> ) <sub>3</sub> CH <sub>3</sub> | OH             |

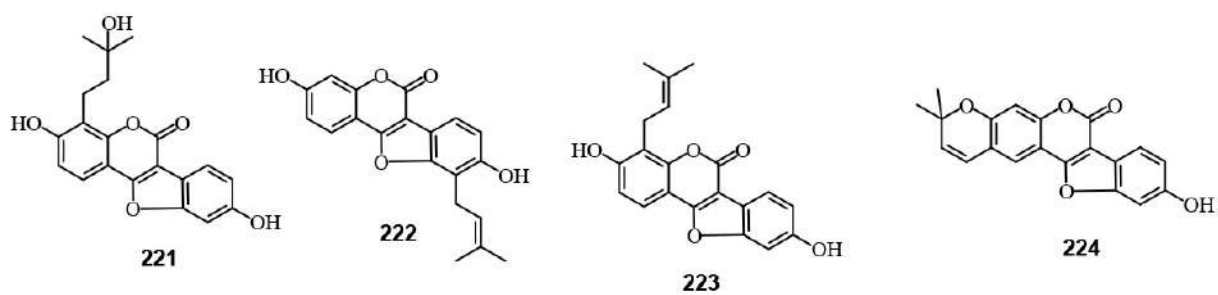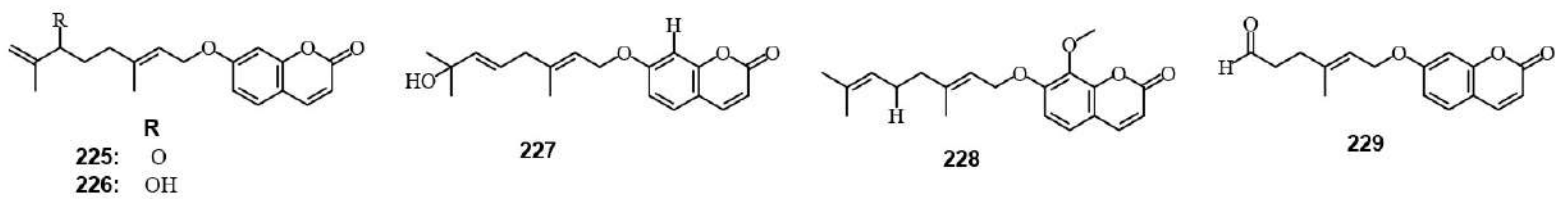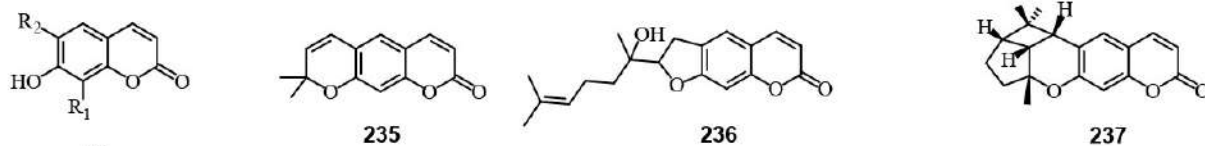

|      | $R_1$            | $R_2$                |
|------|------------------|----------------------|
| 230: | H                | 6,7-dihydroxygeranyl |
| 231: | H                | geranyl              |
| 232: | H                | H                    |
| 233: | H                | OCH <sub>3</sub>     |
| 234: | OCH <sub>3</sub> | geranyl              |

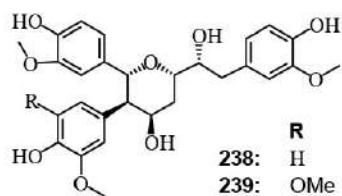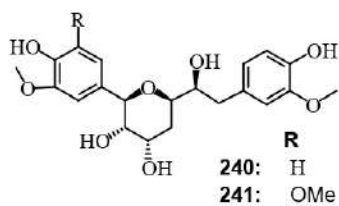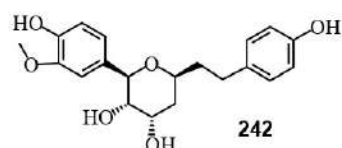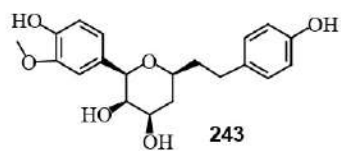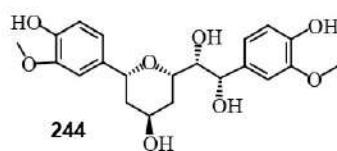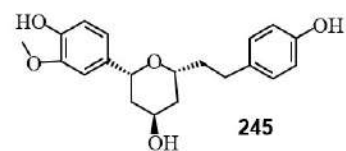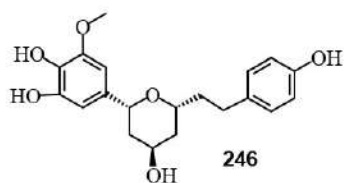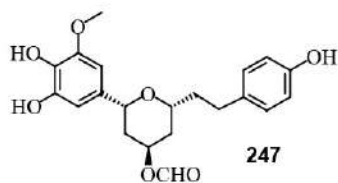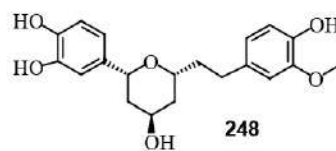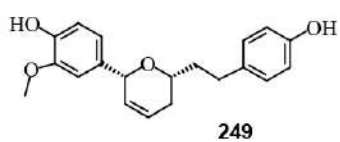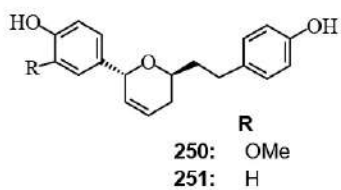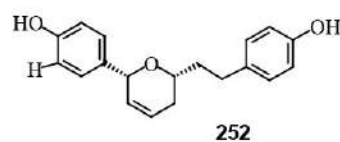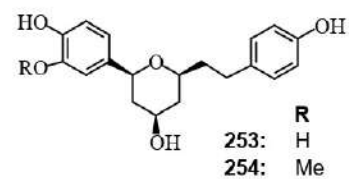

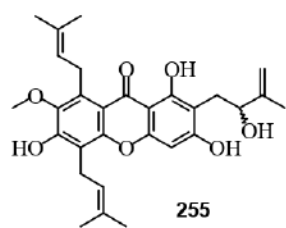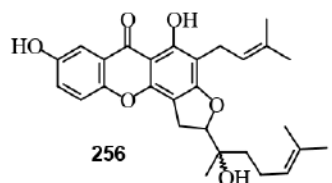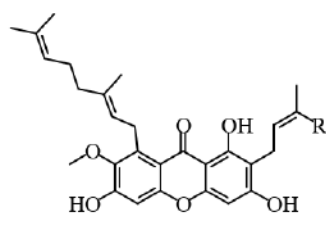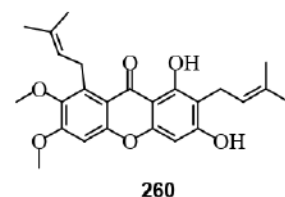

- 257:** CH<sub>3</sub>  
**258:** CH<sub>2</sub>OH  
**259:** CH<sub>2</sub>OCOCH<sub>3</sub>

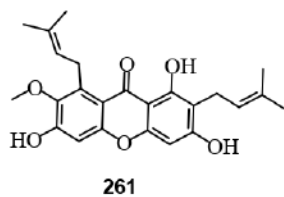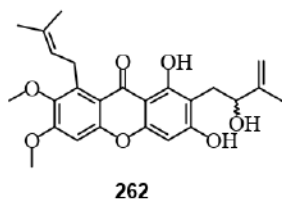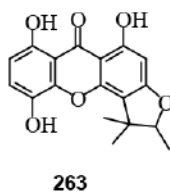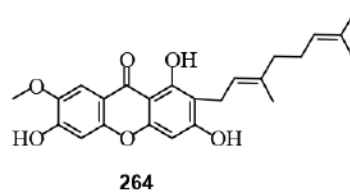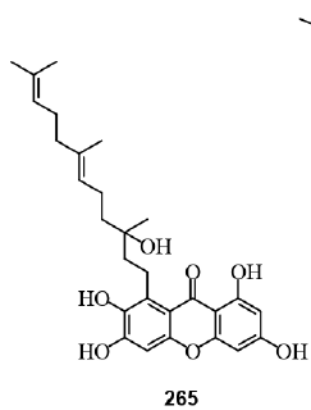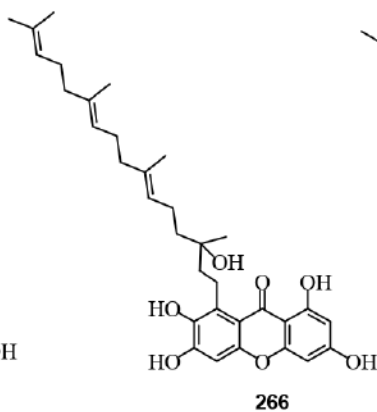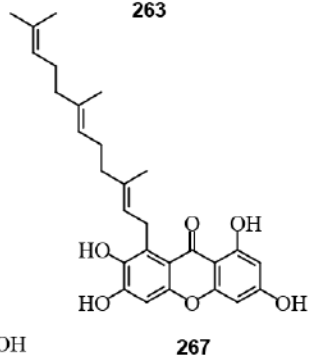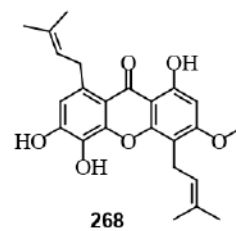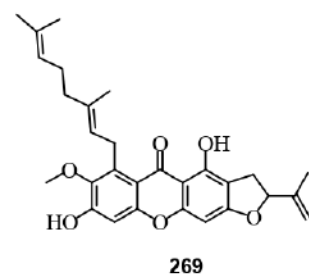

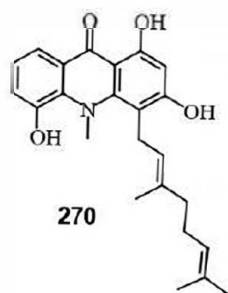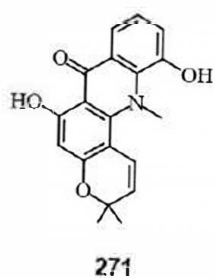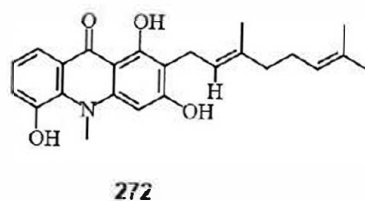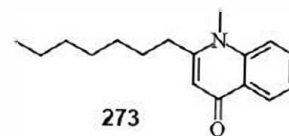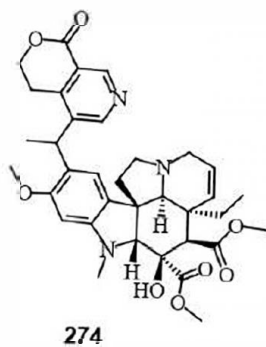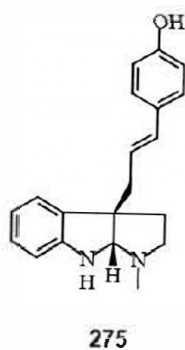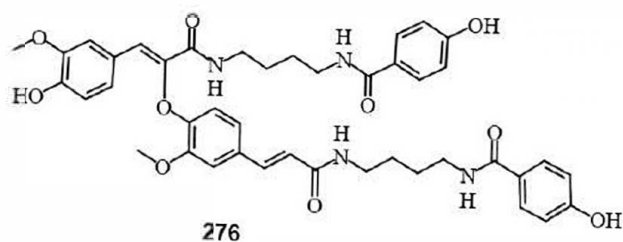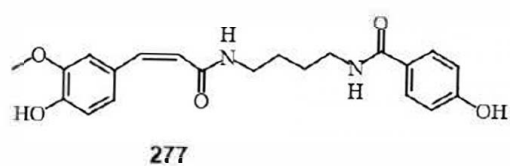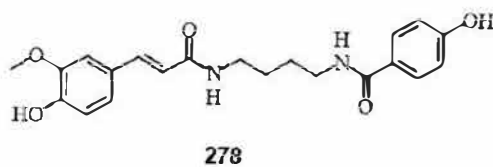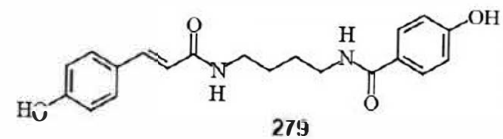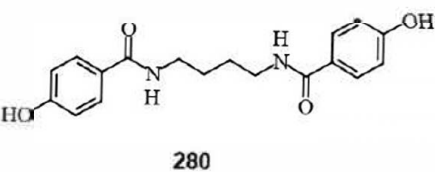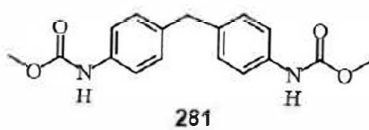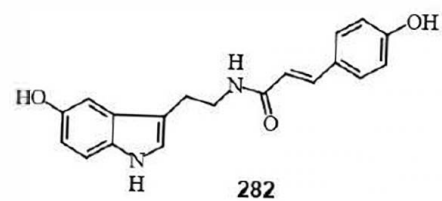

Online resource 2: Chemical structures of plant-derived alpha-glucosidase inhibiting molecules.

## References

- Ajish KR, Antu KA, Riya MP, et al (2015) Studies on  $\alpha$ -glucosidase, aldose reductase and glycation inhibitory properties of sesquiterpenes and flavonoids of *Zingiber zerumbet* Smith. *Nat Prod Res* 29:947–952
- Alkefaia NHA, Amin S, Sharma M, et al (2019) New olean-15-ene type gymnemic acids from *Gymnema sylvestre* (Retz.) R. Br. and their antihyperglycemic activity through  $\alpha$ -glucosidase inhibition. *Phytochem Lett* 32:83–89
- Alqahtani AS, Hidayathulla S, Rehman MT, et al (2020) Alpha-amylase and alpha-glucosidase enzyme inhibition and antioxidant potential of 3-oxolupenal and katononic acid isolated from *Nuxia oppositifolia*. *Biomolecules* 10:1–19
- Chang CC, Ho SL, Lee SS (2015) Acylated glucosylflavones as  $\alpha$ -glucosidase inhibitors from *Tinospora crispa* leaf. *Bioorg Med Chem* 23:3388–3396
- Chen GY, Zhang B, Zhao T, et al (2019) A new triterpenoid glucoside from *Leucas zeylanica*. *Nat Prod Res* 0:1–5
- Chen K, Liu XQ, Wang WL, et al (2020) Taxumarienes A–G, seven new  $\alpha$ -glucosidase inhibitory taxane-diterpenoids from the leaves of *Taxus mairei*. *Bioorg Chem* 94:1–8
- Choi CI, Lee SR, Kim KH (2015) Antioxidant and  $\alpha$ -glucosidase inhibitory activities of constituents from *Euonymus alatus* twigs. *Ind Crops Prod* 76:1055–1060
- Dang PH, Le TH, Phan PKT, et al (2017a) Two acridones and two coumarins from the roots of *Paramignya trimera*. *Tetrahedron Lett* 58:1553–1557
- Dang PH, Nguyen HX, Nguyen HHT, et al (2017b) Lignans from the roots of *Taxus wallichiana* and their  $\alpha$ -glucosidase inhibitory activities. *J Nat Prod* 80:1876–1882
- Deng ZT, Geng CA, Yang TH, et al (2019) Chepraecoxins A–G, ent-kaurane diterpenoids with  $\alpha$ -Glucosidase inhibitory activities from *Chelonopsis praecox*. *Fitoterapia* 132:60–67
- Etsassala NGER, Badmus JA, Waryo TT, et al (2019) Alpha-glucosidase and alpha-amylase inhibitory activities of novel abietane diterpenes from *Salvia Africana-Lutea*. *Antioxidants* 8:1–12
- Ha MT, Seong SH, Nguyen TD, et al (2018) Chalcone derivatives from the root bark of *Morus alba* L. act as inhibitors of PTP1B and  $\alpha$ -glucosidase. *Phytochemistry* 155:114–125
- He X, Zhang X, Geng C, et al (2020) Tsaokopyranols A–M, 2,6-epoxydiarylheptanoids from *Amomum tsao-ko* and their  $\alpha$ -glucosidase inhibitory activity. *Bioorg Chem* 96:1–11
- Jiang MY, Luo M, Tian K, et al (2019)  $\alpha$ -glucosidase inhibitory and anti-inflammatory coumestans from the roots of *Dolichos trilobus*. *Planta Med* 85:112–117



- Jung HA, Ali MY, Choi JS (2017) Promising inhibitory effects of anthraquinones, naphthopyrone, and naphthalene glycosides, from *Cassia obtusifolia* on  $\alpha$ -glucosidase and human protein tyrosine phosphatases 1B. *Molecules* 22:1–15
- Lee DY, Kim HW, Yang H, Sung SH (2017) Hydrolyzable tannins from the fruits of *Terminalia chebula* Retz and their  $\alpha$ -glucosidase inhibitory activities. *Phytochemistry* 137:109–116
- Li M, Wu X, Wang X, et al (2018) Two novel compounds from the root bark of *Morus alba* L. *Nat Prod Res* 32:36–42
- Li Q, Zhang X, Cao J, et al (2015) Depside derivatives with anti-hepatic fibrosis and anti-diabetic activities from *Impatiens balsamina* L. flowers. *Fitoterapia* 105:234–239
- Li X, Zhong X, Wang X, et al (2019a) Bioassay-guided isolation of triterpenoids as  $\alpha$ -glucosidase inhibitors from *Cirsium setosum*. *Molecules* 24:1–10
- Li X, Zhu L, Chen J, et al (2019b) C-Methylated flavanones from the rhizomes of *Matteuccia intermedia* and their  $\alpha$ -glucosidase inhibitory activity. *Fitoterapia* 136:1–10
- Liu Y, Dong JY, Ren B (2018) A new flavanone from seeds of *psoralea corylifolia* with  $\alpha$ -glucosidase inhibitory activity. *Nat Prod Commun* 13:841–843
- Luo HY, Guo RX, Yu XK, et al (2019) Chemical constituents from the seeds of *Cassia obtusifolia* and their *in vitro*  $\alpha$ -glucosidase inhibitory and antioxidant activities. *Bioorg Med Chem Lett* 29:1576–1579
- Mo Q, Zhou X, Huang S, et al (2019) A new triterpenoid from the leaves of *Rhodomyrtus tomentosa* (Ait.) Hassk. *Nat Prod Res* 0:1–6
- Nguyen LTT, Vo HKT, Dang S V, et al (2017a) Labdane and norlabdane diterpenoids from the aerial parts of *Leonurus japonicus*. *Phytochem Lett* 22:174–178
- Nguyen NK, Truong XA, Bui TQ, et al (2017b)  $\alpha$ -glucosidase inhibitory xanthenes from the roots of *Garcinia fusca*. *Chem Biodivers* 14:4–11
- Nguyen PH, Zhao BT, Kim O, et al (2016) Anti-inflammatory terpenylated coumarins from the leaves of *Zanthoxylum schinifolium* with  $\alpha$ -glucosidase inhibitory activity. *J Nat Med* 70:276–281
- Nguyen TT, Nguyen DH, Zhao BT, et al (2017c) A new lignan and a new alkaloid, and  $\alpha$ -glucosidase inhibitory compounds from the grains of *Echinochloa utilis* Ohwi & Yabuno. *Bioorg Chem* 74:221–227
- Ouyang JK, Dong LM, Xu QL, et al (2018) Triterpenoids with  $\alpha$ -glucosidase inhibitory activity and cytotoxic activity from the leaves of *Akebia trifoliata*. *Chem Sci* 8:40483–40489
- Qin N, Jia C, Xu J, et al (2017) New amides from seeds of *Silybum marianum* with potential antioxidant and antidiabetic activities. *Fitoterapia* 119:83–89
- Raksat A, Phukhatmuen P, Yang J, et al (2019) Phloroglucinol benzophenones and xanthenes from the leaves of *Garcinia cowa* and their nitric oxide production and  $\alpha$ -glucosidase inhibitory activities. *J Nat Prod* 83:164–168

- Rizvi TS, Hussain I, Ali L, et al (2019) New gorgonane sesquiterpenoid from *Teucrium mascatense* Boiss, as  $\alpha$ -glucosidase inhibitor. S Afr J Bot 124:218–222
- Sasikumar P, Sharathna P, Prabha B, et al (2018) Dihydro- $\beta$ -agarofuran sesquiterpenoids from the seeds of *Celastrus paniculatus* Willd. and their  $\alpha$ -glucosidase inhibitory activity. Phytochem Lett 26:1–8
- Seong SH, Roy A, Jung HA, et al (2016) Protein tyrosine phosphatase 1B and  $\alpha$ -glucosidase inhibitory activities of *Pueraria lobata* root and its constituents. J Ethnopharmacol 194:706–716
- Şöhretoğlu D, Sari S, Özel A, Barut B (2017)  $\alpha$ -Glucosidase inhibitory effect of *Potentilla astracanica* and some isoflavones: Inhibition kinetics and mechanistic insights through *in vitro* and *in silico* studies. Int J Biol Macromol 105:1062–1070
- Şöhretoğlu D, Sari S, Şoral M, et al (2018) Potential of *Potentilla inclinata* and its polyphenolic compounds in  $\alpha$ -glucosidase inhibition: Kinetics and interaction mechanism merged with docking simulations. Int J Biol Macromol 108:81–87
- Thuy NTL, Thuy PT, Tung BT, et al (2019) A new flavone glycoside from *Lumnitzera littorea* with *in vitro*  $\alpha$ -glucosidase inhibitory activity. Nat Prod Commun 14:1–5
- Tiong SH, Looi CY, Arya A, et al (2015) Vindogentianine, a hypoglycemic alkaloid from *Catharanthus roseus* (L.) G. Don (Apocynaceae). Fitoterapia 102:182–188
- Trinh BTD, Quach TTT, Bui DN, et al (2017) Xanthonenes from the twigs of *Garcinia oblongifolia* and their antidiabetic activity. Fitoterapia 118:126–131
- Trinh DH, Tran PT, Trinh BTD, et al (2020) Coumarins and acridone alkaloids with  $\alpha$ -glucosidase inhibitory and antioxidant activity from the roots of *Paramignya trimera*. Phytochem Lett 35:94–98
- Wang F, Zhang L, Li BJ, et al (2019) Cysestermerol A, a rare stilbene sestermer with significant hypoglycemic activities from *Cynodon dactylon*. Nat Prod Res 0:1–7
- Wang X, Liu Q, Zhu H, et al (2017a) Flavanols from the *Camellia sinensis* var. *assamica* and their hypoglycemic and hypolipidemic activities. Acta Pharm Sin B 7:342–346
- Wang XL, Jiao FR, Yu M, et al (2017b) Constituents with potent  $\alpha$ -glucosidase inhibitory activity from *Pueraria lobata* (Willd.) Ohwi. Bioorg Med Chem Lett 27:1993–1998
- Wang Y, Yu M, Xu L, et al (2018) Diels–Alder type adducts with potent  $\alpha$ -glucosidase inhibitory activity from *Morus macroura*. Phytochem Lett 26:149–153
- Wei J, Huo X, Yu Z, et al (2017a) Phenolic acids from *Balanophora involucrate* and their bioactivities. Fitoterapia 121:129–135
- Wei Y, Wang C, Cheng Z, et al (2017b) Heterodimeric diterpenoids isolated from *Euphorbia ebracteolata* roots and their inhibitory effects on  $\alpha$ -glucosidase. J NatProd 80:3218–3223
- Wei Y, Yu Z, Huo X, et al (2017c) Diterpenoids from the roots of *Euphorbia fischeriana* and their inhibitory effects on  $\alpha$ -glucosidase. J Asian Nat Prod Res 20:1–8

- Xiao Y, Xie H, Zhao L, Gou P (2016) Acyl flavone and lignan glucosides from *Leontopodium leontopodioides*. *Phytochem Lett* 17:247–250
- Yan D, Geng C, Yang T, et al (2018) LC-MS guided isolation of diterpenoids from *Sapium insigne* with  $\alpha$ -glucosidase inhibitory activities. *Fitoterapia* 128:57–65
- Yang JB, Tian JY, Dai Z, et al (2017)  $\alpha$ -glucosidase inhibitors extracted from the roots of *Polygonum multiflorum* Thunb. *Fitoterapia* 117:65–70
- Yin H, Dan WJ, Fan BY, et al (2019) Anti-inflammatory and  $\alpha$ -Glucosidase inhibitory activities of labdane and norlabdane diterpenoids from the rhizomes of *Amomum villosum*. *J Nat Prod* 82:2963–2971
- Yue J, Xu J, Cao J, et al (2017) Cucurbitane triterpenoids from *Momordica charantia* L. and their inhibitory activity against  $\alpha$ -glucosidase,  $\alpha$ -amylase and protein tyrosine phosphatase 1B (PTP1B). *J Funct Foods* 37:624–631
- Zeng YR, Wang LP, Hu ZX, et al (2018) Chromanopyrones and a flavone from *Hypericum monogynum*. *Fitoterapia* 125:59–64
- Zhang CC, Geng CA, Huang XY, et al (2019) Antidiabetic stilbenes from peony seeds with PTP1B,  $\alpha$ -Glucosidase, and DPPIV inhibitory activities. *J Agric Food Chem* 67:6765–6772
- Zhang LB, Chang JJ, Guo LM, Lv JL (2020) Triterpenoids with  $\alpha$ -glucosidase inhibitory activity from *Artemisia argyi*. *J Asian Nat Prod Res* 22:241–248
- Zhu G, Luo Y, Xu X, et al (2019) Anti-diabetic compounds from the seeds of *Psoralea corylifolia*. *Fitoterapia* 139:1–6
